# Supplementary material for: Spreading of the High-Pathogenicity Avian Influenza (H5N1) Virus of Clade 2.3.4.4b into Uruguay
Source: MDPI journal article supplement (doi:10.3390/v15091906), 2023-09-11

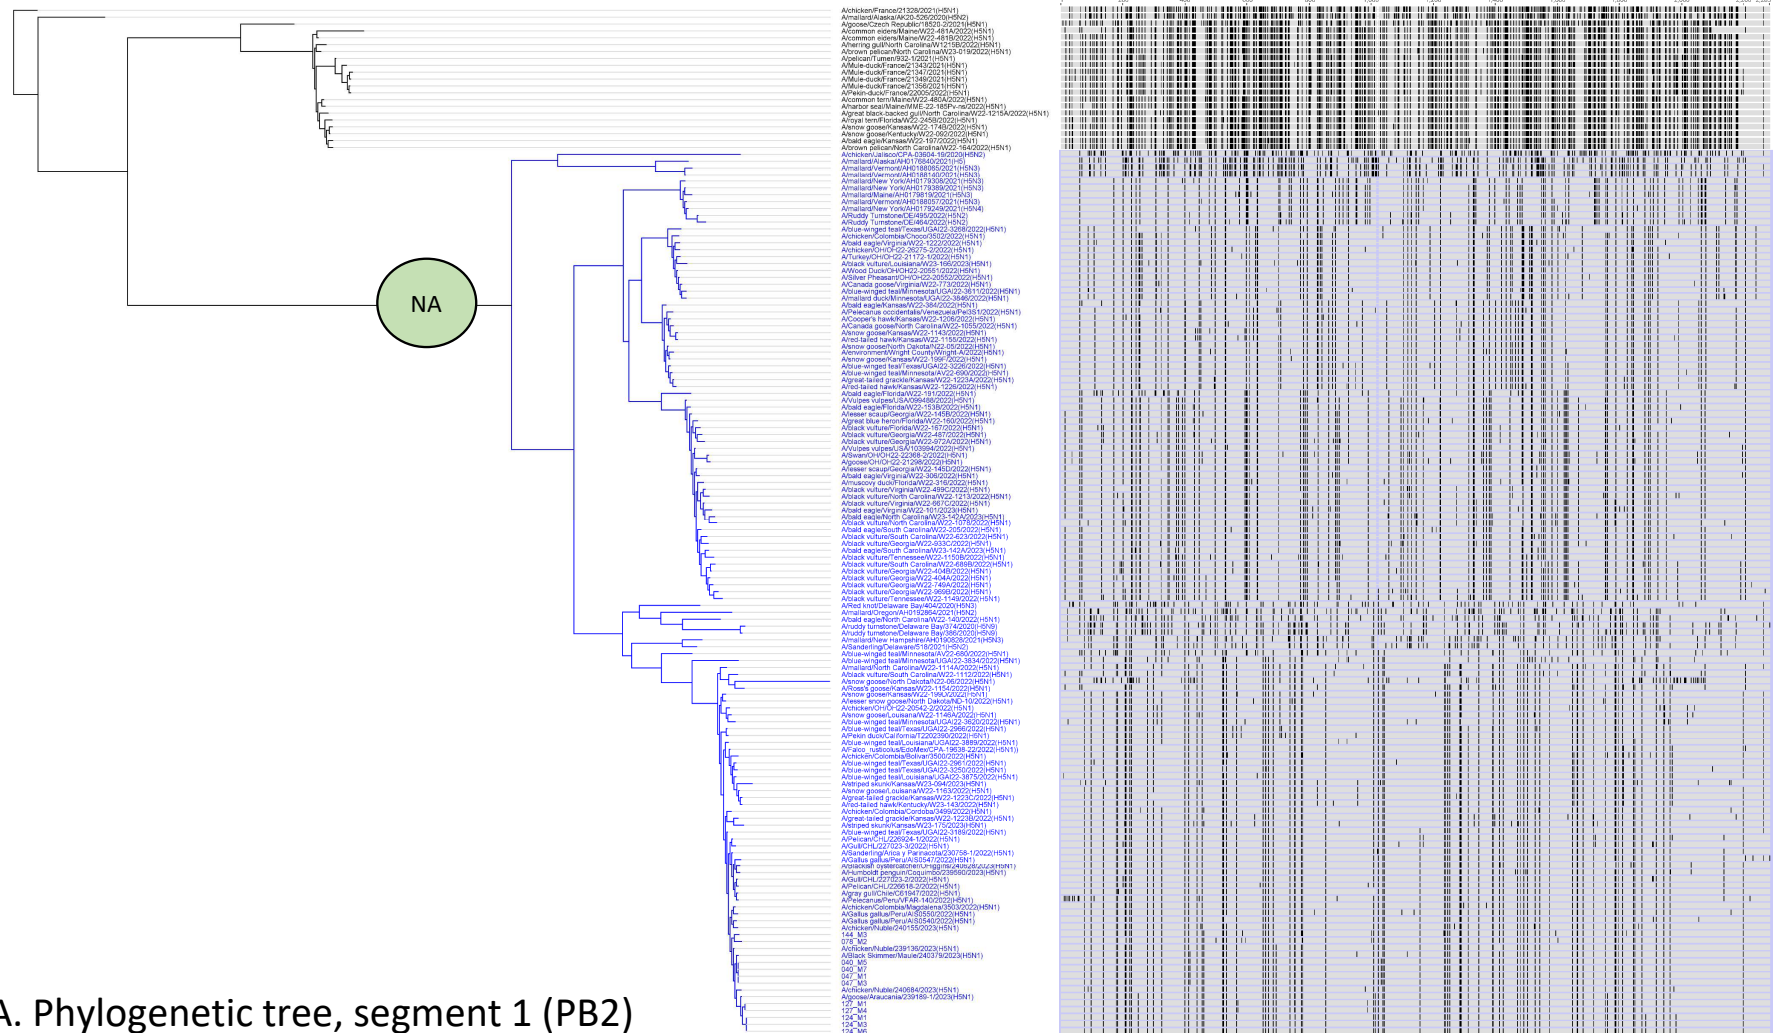

Figure S1A. Phylogenetic tree, segment 1 (PB2)

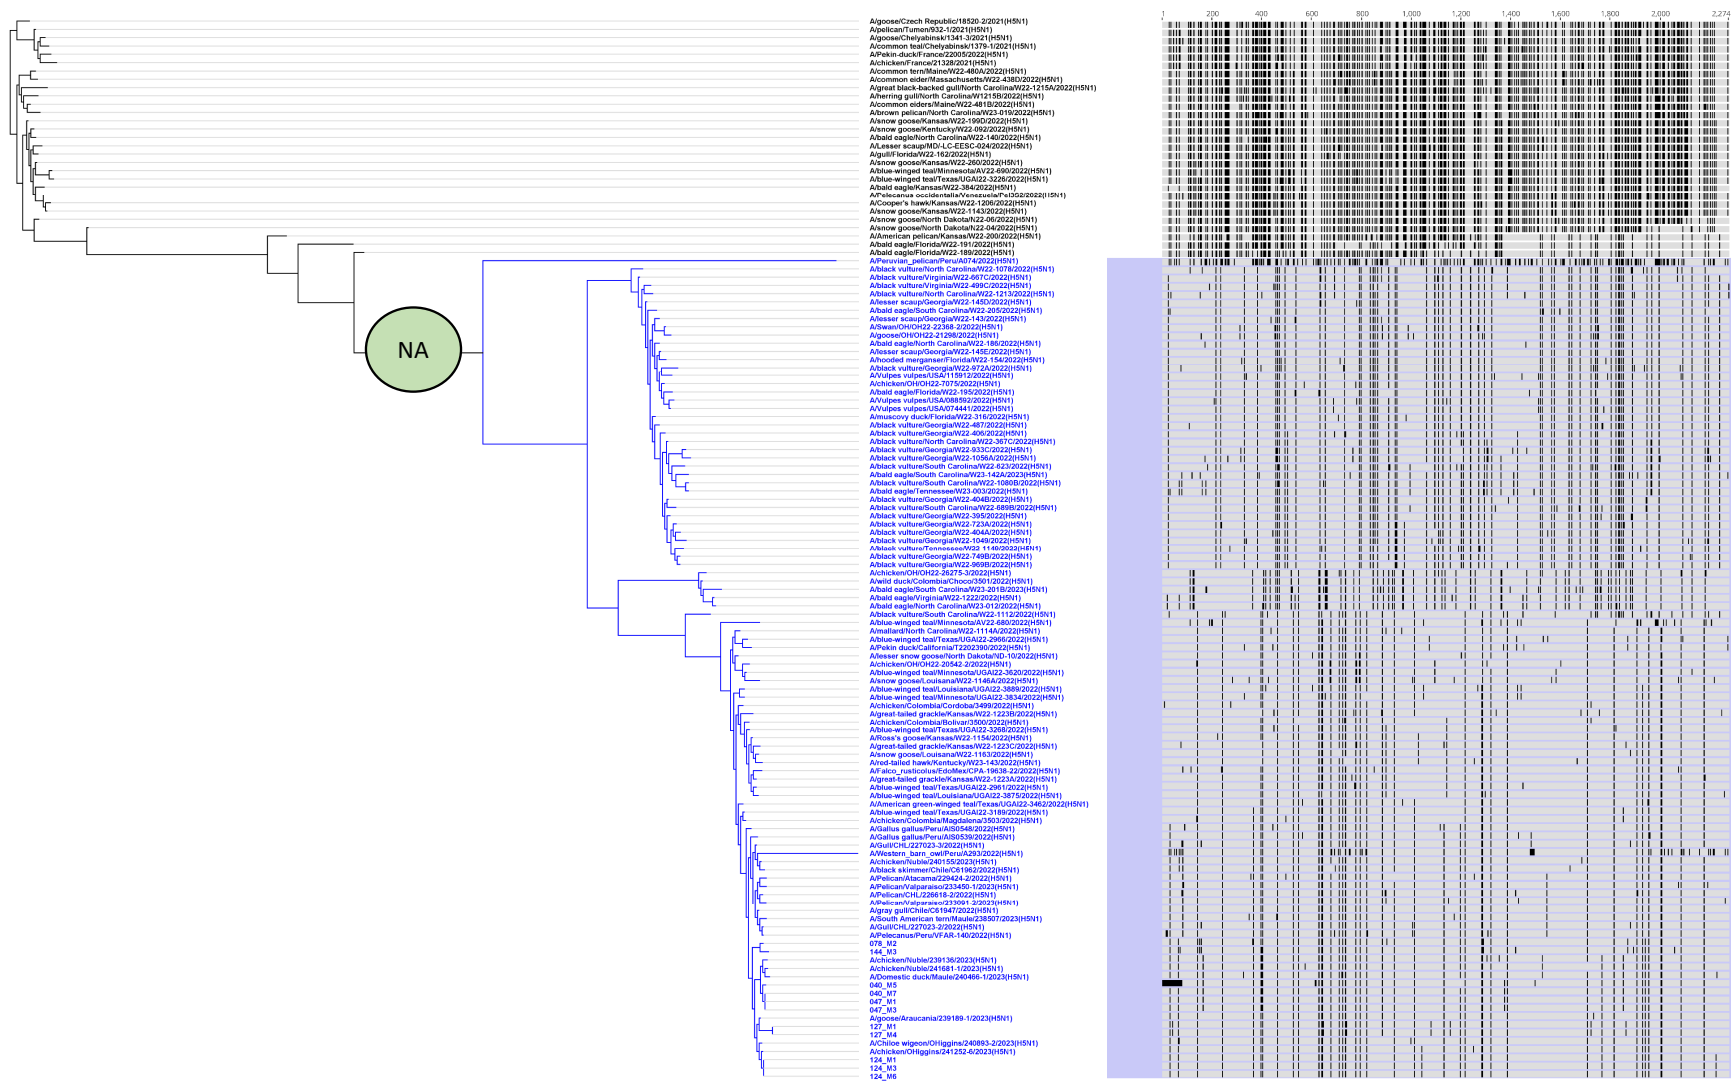

Figure S1B. Phylogenetic tree, segment 2 (PB1)



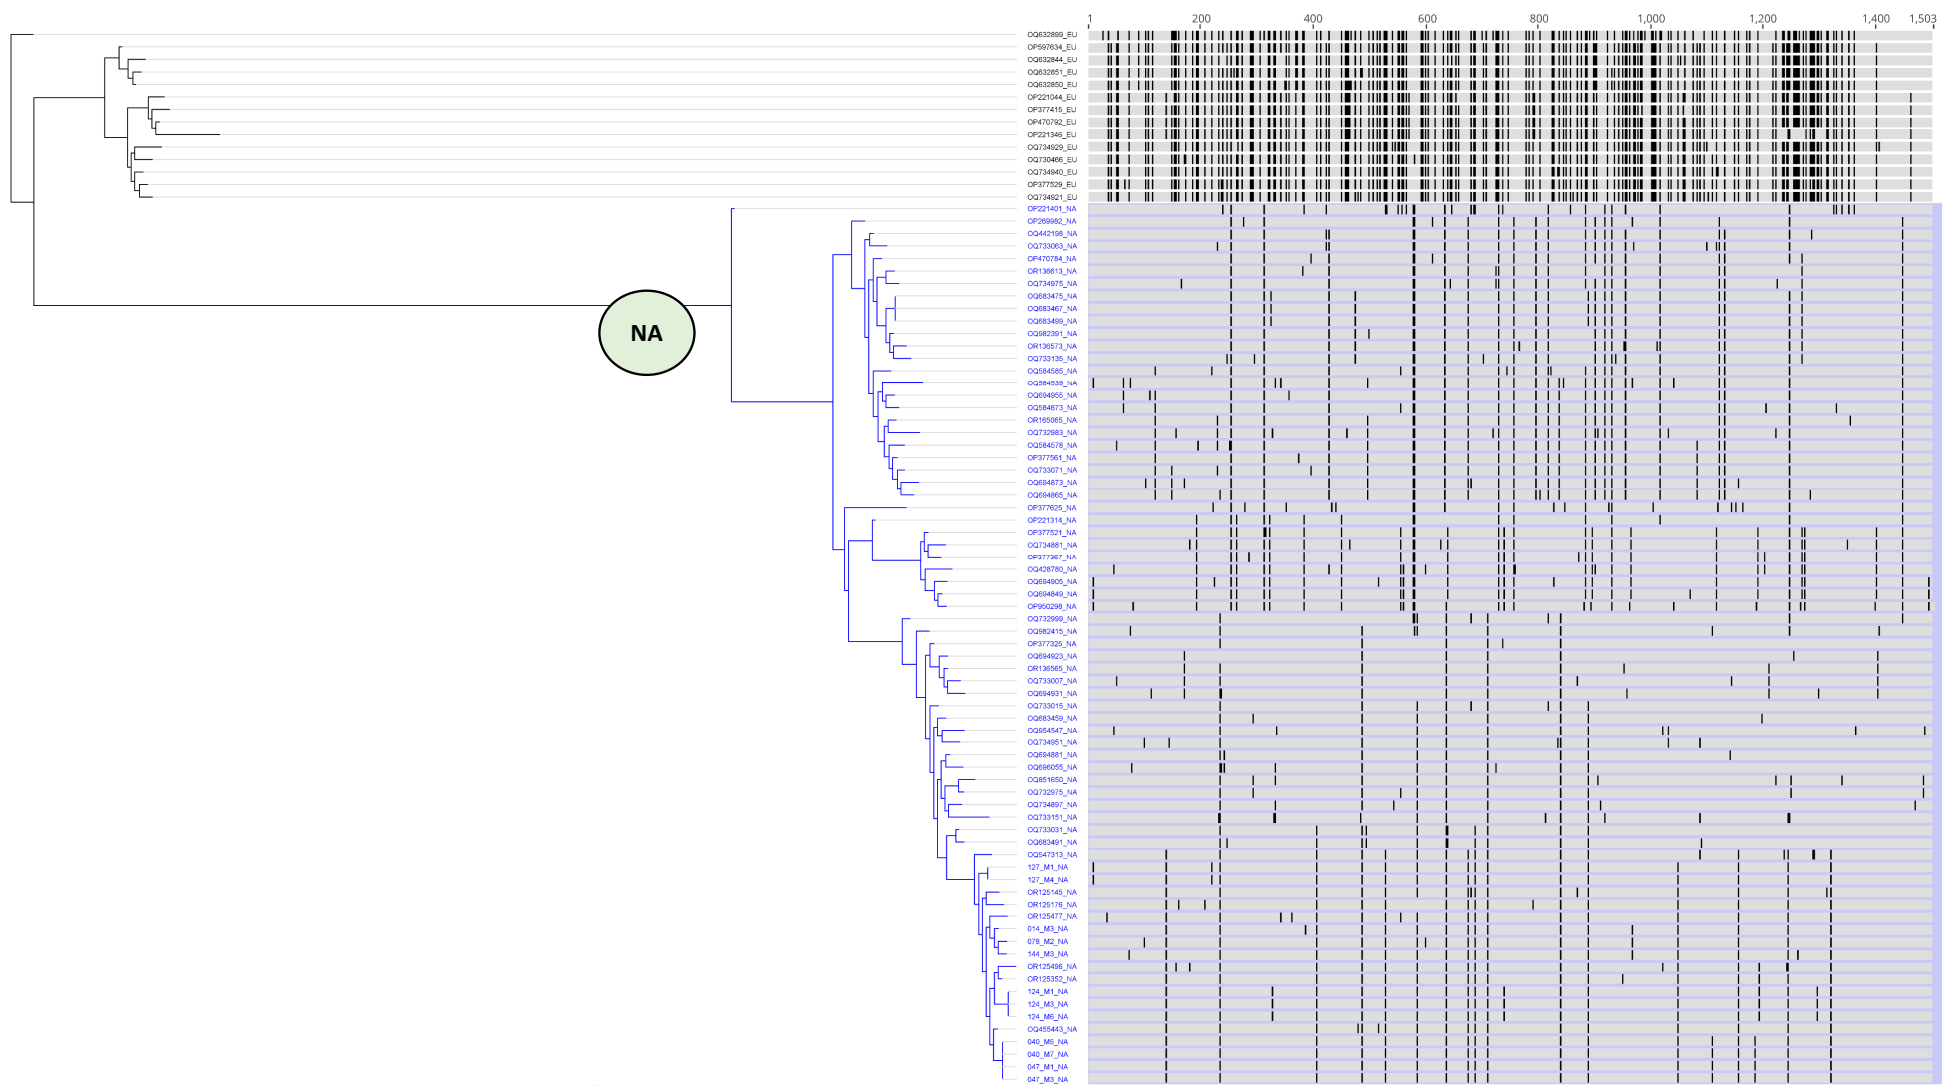

Figure S1D. Phylogenetic tree, segment 5 (NP)

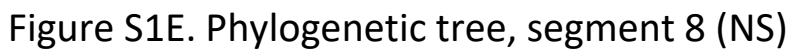

Supplement: s1 [file s1]
