# Supplementary material for: Spreading of the High-Pathogenicity Avian Influenza (H5N1) Virus of Clade 2.3.4.4b into Uruguay
Source: MDPI journal article supplement (doi:10.3390/v15091906), 2023-09-11
Supplement: s1 [file s1]

**Table S1.** Nucleotide variants observed in the Uruguayan sequences. The nucleotide change (Change), the position in the coding sequence (CDS) and in the codon (Codon number), and the number of sequences (n°) with the change are indicated. The amino acid (AA) change and its effect on the protein (Protein effect) are also shown for each single nucleotide polymorphism (SNP).

| gene | Change | CDS position | Codon number | Codon change | AA change | Polymorphism.Type  | Protein effect | n° |
|------|--------|--------------|--------------|--------------|-----------|--------------------|----------------|----|
| HA   | T -> C | 32           | 11           | GTT -> GCT   | V -> A    | SNP (transition)   | Substitution   | 1  |
| HA   | G -> A | 191          | 64           | AGG -> AAG   | R -> K    | SNP (transition)   | Substitution   | 11 |
| HA   | A -> C | 205          | 69           | AAG -> CAG   | K -> Q    | SNP (transversion) | Substitution   | 1  |
| HA   | T -> C | 216          | 72           | AGT -> AGC   |           | SNP (transition)   | None           | 1  |
| HA   | G -> A | 263          | 88           | AGA -> AAA   | R -> K    | SNP (transition)   | Substitution   | 1  |
| HA   | G -> T | 295          | 99           | GCT -> TCT   | A -> S    | SNP (transversion) | Substitution   | 3  |
| HA   | C -> T | 357          | 119          | CAC -> CAT   |           | SNP (transition)   | None           | 1  |
| HA   | G -> T | 468          | 156          | GCG -> GCT   |           | SNP (transversion) | None           | 5  |
| HA   | T -> C | 585          | 195          | CAT -> CAC   |           | SNP (transition)   | None           | 2  |
| HA   | T -> C | 786          | 262          | AAT -> AAC   |           | SNP (transition)   | None           | 3  |
| HA   | C -> A | 865          | 289          | CAC -> AAC   | H -> N    | SNP (transversion) | Substitution   | 4  |
| HA   | G -> A | 1143         | 381          | GCG -> GCA   |           | SNP (transition)   | None           | 4  |
| HA   | T -> C | 1185         | 395          | AAT -> AAC   |           | SNP (transition)   | None           | 1  |
| HA   | C -> T | 1194         | 398          | AAC -> AAT   |           | SNP (transition)   | None           | 1  |
| HA   | A -> G | 1201         | 401          | ATT -> GTT   | I -> V    | SNP (transition)   | Substitution   | 1  |
| HA   | C -> T | 1218         | 406          | ACC -> ACT   |           | SNP (transition)   | None           | 9  |
| HA   | C -> T | 1251         | 417          | AAC -> AAT   |           | SNP (transition)   | None           | 2  |
| HA   | T -> C | 1317         | 439          | TAT -> TAC   |           | SNP (transition)   | None           | 2  |
| HA   | C -> T | 1440         | 480          | AAC -> AAT   |           | SNP (transition)   | None           | 1  |
| HA   | A -> G | 1503         | 501          | ACA -> ACG   |           | SNP (transition)   | None           | 9  |
| M2   | A -> G | 103          | 35           | ATC -> GTC   | I -> V    | SNP (transition)   | Substitution   | 2  |
| M2   | G -> A | 151          | 51           | GTT -> ATT   | V -> I    | SNP (transition)   | Substitution   | 5  |
| M1   | G -> A | 343          | 115          | GTT -> ATT   | V -> I    | SNP (transition)   | Substitution   | 4  |
| M1   | C -> T | 435          | 145          | GGC -> GGT   |           | SNP (transition)   | None           | 2  |
| M1   | C -> G | 500          | 167          | ACC -> AGC   | T -> S    | SNP (transversion) | Substitution   | 1  |
| M1   | G -> A | 544          | 182          | GCC -> ACC   | A -> T    | SNP (transition)   | Substitution   | 1  |
| M1   | C -> A | 681          | 227          | GCC -> GCA   |           | SNP (transversion) | None           | 4  |
| NA   | G -> A | 55           | 19           | GTA -> ATA   | V -> I    | SNP (transition)   | Substitution   | 11 |
| NA   | C -> T | 90           | 30           | ATC -> ATT   |           | SNP (transition)   | None           | 5  |
| NA   | T -> C | 130          | 44           | TAC -> CAC   | Y -> H    | SNP (transition)   | Substitution   | 4  |
| NA   | C -> T | 180          | 60           | ACC -> ACT   |           | SNP (transition)   | None           | 1  |
| NA   | A -> T | 202          | 68           | AAC -> TAC   | N -> Y    | SNP (transversion) | Substitution   | 4  |
| NA   | C -> T | 415          | 139          | CTG -> TTG   |           | SNP (transition)   | None           | 2  |
| NA   | G -> A | 474          | 158          | TTG -> TTA   |           | SNP (transition)   | None           | 3  |
| NA   | A -> C | 576          | 192          | ACA -> ACC   |           | SNP (transversion) | None           | 2  |
| NA   | C -> T | 600          | 200          | AAC -> AAT   |           | SNP (transition)   | None           | 9  |
| NA   | G -> A | 850          | 284          | GAT -> AAT   | D -> N    | SNP (transition)   | Substitution   | 1  |
| NA   | C -> T | 918          | 306          | TTC -> TTT   |           | SNP (transition)   | None           | 11 |

|     |        |      |                |        |                    |              |    |
|-----|--------|------|----------------|--------|--------------------|--------------|----|
| NA  | C -> A | 1019 | 340 TCT -> TAT | S -> Y | SNP (transversion) | Substitution | 3  |
| NA  | T -> C | 1191 | 397 ACT -> ACC |        | SNP (transition)   | None         | 1  |
| NA  | C -> T | 1353 | 451 GAC -> GAT |        | SNP (transition)   | None         | 1  |
| NP  | T -> C | 9    | 3 TCT -> TCC   |        | SNP (transition)   | None         | 2  |
| NP  | A -> G | 72   | 24 GAA -> GAG  |        | SNP (transition)   | None         | 1  |
| NP  | T -> A | 99   | 33 GTT -> GTA  |        | SNP (transversion) | None         | 1  |
| NP  | G -> A | 219  | 73 GAG -> GAA  |        | SNP (transition)   | None         | 2  |
| NP  | C -> T | 327  | 109 ATC -> ATT |        | SNP (transition)   | None         | 3  |
| NP  | C -> A | 387  | 129 GCC -> GCA |        | SNP (transversion) | None         | 11 |
| NP  | G -> A | 600  | 200 GGG -> GGA |        | SNP (transition)   | None         | 1  |
| NP  | G -> A | 738  | 246 CGG -> CGA |        | SNP (transition)   | None         | 3  |
| NP  | T -> G | 967  | 323 TCT -> GCT | S -> A | SNP (transversion) | Substitution | 9  |
| NP  | A -> G | 1109 | 370 AAC -> AGC | N -> S | SNP (transition)   | Substitution | 4  |
| NP  | A -> G | 1184 | 395 AAC -> AGC | N -> S | SNP (transition)   | Substitution | 4  |
| NP  | C -> T | 1191 | 397 AAC -> AAT |        | SNP (transition)   | None         | 3  |
| NP  | T -> A | 1259 | 420 TTC -> TAC | F -> Y | SNP (transversion) | Substitution | 1  |
| NP  | A -> G | 1293 | 431 GGA -> GGG |        | SNP (transition)   | None         | 3  |
| NS1 | T -> C | 65   | 22 TTT -> TCT  | F -> S | SNP (transition)   | Substitution | 1  |
| NS1 | T -> C | 99   | 33 CTT -> CTC  |        | SNP (transition)   | None         | 2  |
| NS1 | C -> A | 111  | 37 CGC -> CGA  |        | SNP (transversion) | None         | 4  |
| NS1 | A -> G | 129  | 43 CTA -> CTG  |        | SNP (transition)   | None         | 2  |
| NEP | C -> A | 133  | 45 CTT -> ATT  | L -> I | SNP (transversion) | Substitution | 1  |
| NEP | A -> G | 159  | 53 GGA -> GGG  |        | SNP (transition)   | None         | 4  |
| NS1 | C -> T | 222  | 74 GAC -> GAT  |        | SNP (transition)   | None         | 1  |
| NS1 | C -> A | 254  | 85 CCT -> CAT  | P -> H | SNP (transversion) | Substitution | 4  |
| NS1 | C -> T | 262  | 88 CGC -> TGC  | R -> C | SNP (transition)   | Substitution | 2  |
| NEP | A -> C | 265  | 89 ATC -> CTC  | I -> L | SNP (transversion) | Substitution | 4  |
| NEP | T -> C | 279  | 93 AGT -> AGC  |        | SNP (transition)   | None         | 9  |
| NS1 | A -> G | 330  | 110 AAA -> AAG |        | SNP (transition)   | None         | 3  |
| NS1 | A -> G | 367  | 123 ATT -> GTT | I -> V | SNP (transition)   | Substitution | 1  |
| NS1 | C -> A | 605  | 202 GCT -> GAT | A -> D | SNP (transversion) | Substitution | 1  |
| NS1 | A -> G | 631  | 211 AGA -> GGA | R -> G | SNP (transition)   | Substitution | 4  |
| PA  | A -> G | 21   | 7 CAA -> CAG   |        | SNP (transition)   | None         | 2  |
| PA  | A -> C | 168  | 56 GAA -> GAC  | E -> D | SNP (transversion) | Substitution | 1  |
| PA  | G -> A | 364  | 122 GTA -> ATA | V -> I | SNP (transition)   | Substitution | 3  |
| PA  | C -> T | 438  | 146 CAC -> CAT |        | SNP (transition)   | None         | 2  |
| PA  | A -> G | 510  | 170 AGA -> AGG |        | SNP (transition)   | None         | 1  |
| PA  | C -> T | 645  | 215 GCC -> GCT |        | SNP (transition)   | None         | 5  |
| PA  | C -> T | 648  | 216 GAC -> GAT |        | SNP (transition)   | None         | 1  |

|     |        |      |                |        |                    |              |   |
|-----|--------|------|----------------|--------|--------------------|--------------|---|
| PA  | C -> T | 1077 | 359 AAC -> AAT |        | SNP (transition)   | None         | 2 |
| PA  | A -> G | 1213 | 405 AGC -> GGC | S -> G | SNP (transition)   | Substitution | 1 |
| PA  | A -> T | 1254 | 418 ACA -> ACT |        | SNP (transversion) | None         | 1 |
| PA  | C -> T | 1273 | 425 CTT -> TTT | L -> F | SNP (transition)   | Substitution | 1 |
| PA  | C -> T | 1364 | 455 GCC -> GTC | A -> V | SNP (transition)   | Substitution | 2 |
| PA  | C -> G | 1437 | 479 GAC -> GAG | D -> E | SNP (transversion) | Substitution | 5 |
| PA  | C -> G | 1658 | 553 GCA -> GGA | A -> G | SNP (transversion) | Substitution | 1 |
| PA  | G -> A | 1676 | 559 AGG -> AAG | R -> K | SNP (transition)   | Substitution | 1 |
| PA  | C -> G | 1734 | 578 GGC -> GGG |        | SNP (transversion) | None         | 3 |
| PA  | G -> A | 1749 | 583 CGG -> CGA |        | SNP (transition)   | None         | 8 |
| PA  | C -> T | 1753 | 585 CTT -> TTT | L -> F | SNP (transition)   | Substitution | 1 |
| PA  | A -> G | 1808 | 603 AAA -> AGA | K -> R | SNP (transition)   | Substitution | 1 |
| PA  | T -> C | 1956 | 652 TCT -> TCC |        | SNP (transition)   | None         | 3 |
| PA  | T -> C | 1993 | 665 TTG -> CTG |        | SNP (transition)   | None         | 1 |
| PB1 | T -> C | 6    | 2 TAT -> TAC   |        | SNP (transition)   | None         | 1 |
| PB1 | A -> G | 85   | 29 AAA -> GAA  | K -> E | SNP (transition)   | Substitution | 9 |
| PB1 | A -> G | 93   | 31 GGA -> GGG  |        | SNP (transition)   | None         | 9 |
| PB1 | A -> G | 100  | 34 ACA -> GCA  | T -> A | SNP (transition)   | Substitution | 4 |
| PB1 | G -> T | 297  | 99 AAG -> AAT  | K -> N | SNP (transversion) | Substitution | 1 |
| PB1 | C -> T | 336  | 112 AAC -> AAT |        | SNP (transition)   | None         | 5 |
| PB1 | C -> A | 582  | 194 AGC -> AGA | S -> R | SNP (transversion) | Substitution | 2 |
| PB1 | A -> T | 837  | 279 ACA -> ACT |        | SNP (transversion) | None         | 1 |
| PB1 | A -> G | 976  | 326 ATG -> GTG | M -> V | SNP (transition)   | Substitution | 3 |
| PB1 | G -> A | 1014 | 338 AAG -> AAA |        | SNP (transition)   | None         | 2 |
| PB1 | A -> G | 1092 | 364 AGA -> AGG |        | SNP (transition)   | None         | 2 |
| PB1 | A -> G | 1130 | 377 GAT -> GGT | D -> G | SNP (transition)   | Substitution | 1 |
| PB1 | A -> G | 1224 | 408 AGA -> AGG |        | SNP (transition)   | None         | 9 |
| PB1 | A -> G | 1308 | 436 GGA -> GGG |        | SNP (transition)   | None         | 4 |
| PB1 | C -> A | 1353 | 451 GTC -> GTA |        | SNP (transversion) | None         | 1 |
| PB1 | C -> T | 1428 | 476 CGC -> CGT |        | SNP (transition)   | None         | 1 |
| PB1 | A -> G | 1653 | 551 TCA -> TCG |        | SNP (transition)   | None         | 2 |
| PB1 | A -> G | 1698 | 566 GGA -> GGG |        | SNP (transition)   | None         | 9 |
| PB1 | C -> T | 1785 | 595 GAC -> GAT |        | SNP (transition)   | None         | 4 |
| PB1 | T -> C | 1794 | 598 TAT -> TAC |        | SNP (transition)   | None         | 2 |
| PB1 | A -> G | 1803 | 601 AGA -> AGG |        | SNP (transition)   | None         | 9 |
| PB1 | G -> A | 1824 | 608 CCG -> CCA |        | SNP (transition)   | None         | 1 |
| PB1 | C -> T | 1989 | 663 GAC -> GAT |        | SNP (transition)   | None         | 1 |
| PB1 | T -> C | 2157 | 719 GCT -> GCC |        | SNP (transition)   | None         | 3 |
| PB2 | G -> A | 138  | 46 GAG -> GAA  |        | SNP (transition)   | None         | 1 |

|     |        |      |                |        |                    |              |    |
|-----|--------|------|----------------|--------|--------------------|--------------|----|
| PB2 | T -> C | 180  | 60 GAT -> GAC  |        | SNP (transition)   | None         | 5  |
| PB2 | G -> A | 243  | 81 CCG -> CCA  |        | SNP (transition)   | None         | 11 |
| PB2 | G -> A | 501  | 167 AAG -> AAA |        | SNP (transition)   | None         | 2  |
| PB2 | A -> G | 515  | 172 GAC -> GGC | D -> G | SNP (transition)   | Substitution | 1  |
| PB2 | C -> T | 516  | 172 GAC -> GAT |        | SNP (transition)   | None         | 1  |
| PB2 | A -> G | 526  | 176 ACT -> GCT | T -> A | SNP (transition)   | Substitution | 10 |
| PB2 | C -> T | 625  | 209 CTG -> TTG |        | SNP (transition)   | None         | 9  |
| PB2 | G -> A | 684  | 228 AGG -> AGA |        | SNP (transition)   | None         | 3  |
| PB2 | C -> T | 705  | 235 AGC -> AGT |        | SNP (transition)   | None         | 1  |
| PB2 | A -> G | 708  | 236 TTA -> TTG |        | SNP (transition)   | None         | 9  |
| PB2 | T -> C | 743  | 248 ATA -> ACA | I -> T | SNP (transition)   | Substitution | 11 |
| PB2 | T -> C | 918  | 306 ACT -> ACC |        | SNP (transition)   | None         | 2  |
| PB2 | A -> G | 932  | 311 AAT -> AGT | N -> S | SNP (transition)   | Substitution | 9  |
| PB2 | G -> T | 943  | 315 GTC -> TTC | V -> F | SNP (transversion) | Substitution | 5  |
| PB2 | G -> A | 951  | 317 AAG -> AAA |        | SNP (transition)   | None         | 11 |
| PB2 | A -> G | 959  | 320 GAA -> GGA | E -> G | SNP (transition)   | Substitution | 4  |
| PB2 | A -> G | 1162 | 388 ATT -> GTT | I -> V | SNP (transition)   | Substitution | 1  |
| PB2 | T -> C | 1521 | 507 ACT -> ACC |        | SNP (transition)   | None         | 1  |
| PB2 | A -> G | 1530 | 510 TCA -> TCG |        | SNP (transition)   | None         | 1  |
| PB2 | G -> A | 1689 | 563 AAG -> AAA |        | SNP (transition)   | None         | 5  |
| PB2 | G -> A | 1749 | 583 GTG -> GTA |        | SNP (transition)   | None         | 1  |
| PB2 | A -> G | 1812 | 604 GAA -> GAG |        | SNP (transition)   | None         | 3  |
| PB2 | A -> G | 1910 | 637 AAG -> AGG | K -> R | SNP (transition)   | Substitution | 3  |
