# Supplementary material for: Spreading of the High-Pathogenicity Avian Influenza (H5N1) Virus of Clade 2.3.4.4b into Uruguay
Source: MDPI journal article supplement (doi:10.3390/v15091906), 2023-09-11
Supplement: s1 [file s1]

**Table S2.** Sequences used for reassortment analysis showed in Figure 3. Accession numbers (Accession) for the eight avian influenza segments (Segment), country of origin (Country). the strain name (Strains) and the host species (Host) are indicated.

| Accession | Segment | Country        | Strain                                              | Host                                   |
|-----------|---------|----------------|-----------------------------------------------------|----------------------------------------|
| OL334651  | 1 (PB2) | USA            | A/mallard/Alaska/AH0176840/2021(H5)                 | mallard; live bird surveillance        |
| OL638152  | 1 (PB2) | Czech Republic | A/goose/Czech Republic/18520-2/2021(H5N1)           | goose                                  |
| OP269979  | 1 (PB2) | USA            | A/Vulpes vulpes/USA                                 | Vulpes vulpes                          |
| OP269990  | 1 (PB2) | USA            | A/Vulpes vulpes/USA                                 | Vulpes vulpes                          |
| OP377467  | 1 (PB2) | USA            | A/bald eagle/Florida/W22-153B/2022(H5N1)            | Haliaeetus leucocephalus               |
| OP377533  | 1 (PB2) | USA            | A/common eiders/Maine/W22-481B/2022(H5N1)           | Somateria mollissima                   |
| OP377605  | 1 (PB2) | USA            | A/common eiders/Maine/W22-481A/2022(H5N1)           | Somateria mollissima                   |
| OP597635  | 1 (PB2) | Russia         | A/pelican/Tumen/932-1/2021(H5N1)                    | pelican                                |
| OP691321  | 1 (PB2) | Mexico         | A/Falco_rusticolus/EdoMex/CPA-19638-22/2022(H5N1)   | Falco_rusticolus                       |
| OQ584581  | 1 (PB2) | USA            | A/black vulture/South Carolina/W22-623/2022(H5N1)   | Coragyps atratus                       |
| OQ632836  | 1 (PB2) | France         | A/Mule-duck/France/21343/2021(H5N1)                 | Mule-duck                              |
| OQ632837  | 1 (PB2) | France         | A/Mule-duck/France/21347/2021(H5N1)                 | Mule-duck                              |
| OQ632839  | 1 (PB2) | France         | A/Mule-duck/France/21349/2021(H5N1)                 | Mule-duck                              |
| OQ632841  | 1 (PB2) | France         | A/Mule-duck/France/21356/2021(H5N1)                 | Mule-duck                              |
| OQ632842  | 1 (PB2) | France         | A/Pekin-duck/France/22005/2022(H5N1)                | Pekin-duck                             |
| OQ730502  | 1 (PB2) | USA            | A/harbor seal/Maine/MME-22-185Pv-ns/2022(H5N1)      | Phoca vitulina                         |
| OQ733091  | 1 (PB2) | USA            | A/striped skunk/Kansas/W23-094/2023(H5N1)           | Mephitis mephitis                      |
| OQ734917  | 1 (PB2) | USA            | A/great-tailed grackle/Kansas/W22-1223C/2022(H5N1)  | Quiscalus mexicanus                    |
| OQ734954  | 1 (PB2) | USA            | A/great-tailed grackle/Kansas/W22-1223B/2022(H5N1)  | Quiscalus mexicanus                    |
| OQ734963  | 1 (PB2) | USA            | A/great-tailed grackle/Kansas/W22-1223A/2022(H5N1)  | Quiscalus mexicanus                    |
| OQ843962  | 1 (PB2) | USA            | A/environment/Wright County/Wright-A/2022(H5N1)     | NA                                     |
| OQ954551  | 1 (PB2) | USA            | A/striped skunk/Kansas/W23-175/2023(H5N1)           | Mephitis mephitis                      |
| OR125139  | 1 (PB2) | Chile          | A/chicken/Nuble/240684/2023(H5N1)                   | Gallus gallus                          |
| OR125144  | 1 (PB2) | Chile          | A/Blackish oystercatcher/OHiggins/240628/2023(H5N1) | Haematopus ater                        |
| OR125167  | 1 (PB2) | Chile          | A/Humboldt penguin/Coquimbo/239590/2023(H5N1)       | Spheniscus humboldti                   |
| OR125172  | 1 (PB2) | Chile          | A/chicken/Nuble/239136/2023(H5N1)                   | Gallus gallus                          |
| OR125198  | 1 (PB2) | Chile          | A/chicken/Nuble/240155/2023(H5N1)                   | Gallus gallus                          |
| OR125208  | 1 (PB2) | Chile          | A/Black Skimmer/Maule/240379/2023(H5N1)             | Rynchops niger                         |
| OR125248  | 1 (PB2) | Chile          | A/Sanderling/Arica y Parinacota/230758-1/2022(H5N1) | Calidris alba                          |
| OR125332  | 1 (PB2) | Chile          | A/goose/Araucania/239189-1/2023(H5N1)               | Anser sp.                              |
| OR136521  | 1 (PB2) | USA            | A/Silver Pheasant/OH/OH22-20552/2022(H5N1)          | Silver Pheasant; Lophura nycthemera    |
| OR136529  | 1 (PB2) | USA            | A/Swan/OH/OH22-22368-2/2022(H5N1)                   | Swan; Cygnus sp.                       |
| OR136537  | 1 (PB2) | USA            | A/Turkey/OH/OH22-21172-1/2022(H5N1)                 | Turkey; Meleagris gallopavo domesticus |
| OR136545  | 1 (PB2) | USA            | A/Wood Duck/OH/OH22-20551/2022(H5N1)                | Wood Duck; Aix sponsa                  |
| OR136561  | 1 (PB2) | USA            | A/chicken/OH/OH22-20542-2/2022(H5N1)                | Chicken; Gallus gallus domesticus      |
| OR136585  | 1 (PB2) | USA            | A/chicken/OH/OH22-26275-2/2022(H5N1)                | Chicken; Gallus gallus domesticus      |
| OR136616  | 1 (PB2) | USA            | A/goose/OH/OH22-21298/2022(H5N1)                    | Goose; Anser cygnoides domesticus      |
| OR165077  | 1 (PB2) | USA            | A/black vulture/Georgia/W22-487/2022(H5N1)          | Coragyps atratus                       |
| OP221048  | 1 (PB2) | USA            | A/bald eagle/Kansas/W22-197/2022                    | bald eagle                             |
| OP221292  | 1 (PB2) | USA            | A/snow goose/Kansas/W22-199D/2022                   | snow goose                             |
| OP221300  | 1 (PB2) | USA            | A/snow goose/Kansas/W22-199F/2022                   | snow goose                             |
| OP221317  | 1 (PB2) | USA            | A/bald eagle/Florida/W22-191/2022                   | bald eagle                             |
| OP221373  | 1 (PB2) | USA            | A/bald eagle/South Carolina/W22-205/2022            | bald eagle                             |
| OP377329  | 1 (PB2) | USA            | A/snow goose/North Dakota/N22-06/2022               | snow goose                             |
| OP377345  | 1 (PB2) | USA            | A/black vulture/Virginia/W22-499C/2022              | black vulture                          |
| OP377371  | 1 (PB2) | USA            | A/snow goose/North Dakota/N22-05/2022               | snow goose                             |
| OP377387  | 1 (PB2) | USA            | A/bald eagle/Virginia/W22-306/2022                  | bald eagle                             |
| OP377403  | 1 (PB2) | USA            | A/muscovy duck/Florida/W22-306/2022                 | muscovy duck                           |
| OP377419  | 1 (PB2) | USA            | A/royal tern/Florida/W22-245B/2022                  | royal tern                             |
| OP377509  | 1 (PB2) | USA            | A/common tern/Maine/W22-480A/2022                   | common tern                            |
| OP377549  | 1 (PB2) | USA            | A/great blue heron/Florida/W22-160/2022             | great blue heron                       |
| OP377581  | 1 (PB2) | USA            | A/black vulture/Florida/W22-167/2022                | black vulture                          |
| OP377589  | 1 (PB2) | USA            | A/lesser snow goose/North Dakota/ND-10/2022         | lesser snow goose                      |
| OP377597  | 1 (PB2) | USA            | A/snow goose/Kansas/W22-174B/2022                   | snow goose                             |
| OP377613  | 1 (PB2) | USA            | A/brown pelican/North Carolina/W22-164/2022         | brown pelican                          |
| OP377629  | 1 (PB2) | USA            | A/bald eagle/North Carolina/W22-140/2022            | bald eagle                             |
| OP470756  | 1 (PB2) | USA            | A/lesser scaup/Georgia/W22-145B/2022                | lesser scaup                           |
| OP470764  | 1 (PB2) | USA            | A/lesser scaup/Georgia/W22-145D/2022                | lesser scaup                           |
| OP470796  | 1 (PB2) | USA            | A/snow goose/Kentucky/W22-092/2022                  | snow goose                             |
| OP950294  | 1 (PB2) | Venezuela      | A/Pelecanus occidentalis/Venezuela/Pel3S1/2022      | Pelecanus occidentalis                 |
| OQ352553  | 1 (PB2) | Chile          | A/gray gull/Chile/C61947/2022                       | gray gull                              |
| OQ455434  | 1 (PB2) | Chile          | A/Gull/CHL/227023-2/2022                            | Gull                                   |
| OQ455439  | 1 (PB2) | Chile          | A/Gull/CHL/227023-3/2022                            | Gull                                   |
| OQ455444  | 1 (PB2) | Chile          | A/Pelican/CHL/226618-2/2022                         | Pelican                                |
| OQ455463  | 1 (PB2) | Chile          | A/Pelican/CHL/226924-1/2022                         | Pelican                                |
| OQ547317  | 1 (PB2) | Peru           | A/Gallus gallus/Peru/AIS0547/2022                   | Gallus gallus                          |
| OQ547348  | 1 (PB2) | Peru           | A/Gallus gallus/Peru/AIS0540/2022                   | Gallus gallus                          |
| OQ547404  | 1 (PB2) | Peru           | A/Gallus gallus/Peru/AIS0550/2022                   | Gallus gallus                          |
| OQ565625  | 1 (PB2) | Peru           | A/Pelecanus/Peru/VFAR-140/2022                      | Pelecanus                              |
| OQ584527  | 1 (PB2) | USA            | A/black vulture/Georgia/W22-404A/2022               | black vulture                          |
| OQ584543  | 1 (PB2) | USA            | A/black vulture/South Carolina/W22-689B/2022        | black vulture                          |
| OQ584637  | 1 (PB2) | USA            | A/bald eagle/Kansas/W22-384/2022                    | bald eagle                             |
| OQ584708  | 1 (PB2) | USA            | A/black vulture/Virginia/W22-667C/2022              | black vulture                          |
| OQ584716  | 1 (PB2) | USA            | A/black vulture/Georgia/W22-749A/2022               | black vulture                          |
| OQ584732  | 1 (PB2) | USA            | A/black vulture/Georgia/W22-404B/2022               | black vulture                          |
| OQ632896  | 1 (PB2) | France         | A/chicken/France/21328/2021                         | chicken                                |
| OQ683455  | 1 (PB2) | Colombia       | A/chicken/Colombia/Bolivar/3500/2022                | chicken                                |
| OQ683463  | 1 (PB2) | Colombia       | A/chicken/Colombia/Choco/3502/2022                  | chicken                                |
| OQ683479  | 1 (PB2) | Colombia       | A/chicken/Colombia/Cordoba/3499/2022                | chicken                                |
| OQ683487  | 1 (PB2) | Colombia       | A/chicken/Colombia/Magdalena/3503/2022              | chicken                                |
| OQ694853  | 1 (PB2) | USA            | A/snow goose/Kansas/W22-1143/2022                   | snow goose                             |
| OQ694861  | 1 (PB2) | USA            | A/black vulture/North Carolina/W22-1078/2022        | black vulture                          |
| OQ694869  | 1 (PB2) | USA            | A/black vulture/South Carolina/W22-1112/2022        | black vulture                          |
| OQ694885  | 1 (PB2) | USA            | A/snow goose/Louisana/W22-1163/2022                 | snow goose                             |
| OQ694909  | 1 (PB2) | USA            | A/Canada goose/North Carolina/W22-1055/2022         | Canada goose                           |
| OQ694927  | 1 (PB2) | USA            | A/mallard/North Carolina/W22-1114A/2022             | mallard                                |
| OQ694935  | 1 (PB2) | USA            | A/snow goose/Louisana/W22-1146A/2022                | snow goose                             |
| OQ694951  | 1 (PB2) | USA            | A/black vulture/Tennessee/W22-1150B/2022            | black vulture                          |
| OQ694959  | 1 (PB2) | USA            | A/black vulture/Tennessee/W22-1149/2022             | black vulture                          |
| OQ696059  | 1 (PB2) | USA            | A/Ross's goose/Kansas/W22-1154/2022                 | Ross's goose                           |
| OQ696070  | 1 (PB2) | USA            | A/red-tailed hawk/Kansas/W22-1155/2022              | red-tailed hawk                        |
| OQ732947  | 1 (PB2) | USA            | A/black vulture/Georgia/W22-969B/2022               | black vulture                          |
| OQ732963  | 1 (PB2) | USA            | A/blue-winged teal/Minnesota/AV22-690/2022          | blue-winged teal                       |
| OQ732971  | 1 (PB2) | USA            | A/red-tailed hawk/Kentucky/W23-143/2022             | red-tailed hawk                        |
| OQ732979  | 1 (PB2) | USA            | A/blue-winged teal/Texas/UGAI22-2966/2022           | blue-winged teal                       |
| OQ732987  | 1 (PB2) | USA            | A/black vulture/Georgia/W22-933C/2022               | black vulture                          |
| OQ733003  | 1 (PB2) | USA            | A/blue-winged teal/Texas/UGAI22-3268/2022           | blue-winged teal                       |
| OQ733011  | 1 (PB2) | USA            | A/blue-winged teal/Minnesota/UGAI22-3620/2022       | blue-winged teal                       |
| OQ733019  | 1 (PB2) | USA            | A/blue-winged teal/Texas/UGAI22-3250/2022           | blue-winged teal                       |
| OQ733027  | 1 (PB2) | USA            | A/bald eagle/North Carolina/W23-142A/2023           | bald eagle                             |
| OQ733035  | 1 (PB2) | USA            | A/blue-winged teal/Texas/UGAI22-3189/2022           | blue-winged teal                       |
| OQ733067  | 1 (PB2) | USA            | A/black vulture/Georgia/W22-972A/2022               | black vulture                          |
| OQ733075  | 1 (PB2) | USA            | A/bald eagle/South Carolina/W23-142A/2023           | bald eagle                             |
| OQ733083  | 1 (PB2) | USA            | A/blue-winged teal/Texas/UGAI22-3226/2022           | blue-winged teal                       |
| OQ733099  | 1 (PB2) | USA            | A/bald eagle/Virginia/W22-101/2023                  | bald eagle                             |
| OQ733115  | 1 (PB2) | USA            | A/blue-winged teal/Texas/UGAI22-2961/2022           | blue-winged teal                       |
| OQ733131  | 1 (PB2) | USA            | A/blue-winged teal/Minnesota/UGAI22-3611/2022       | blue-winged teal                       |

|          |         |                |                                                         |                                   |
|----------|---------|----------------|---------------------------------------------------------|-----------------------------------|
| OQ733147 | 1 (PB2) | USA            | A/Canada goose/Virginia/W22-773/2022                    | Canada goose                      |
| OQ733155 | 1 (PB2) | USA            | A/blue-winged teal/Minnesota/AV22-680/2022              | blue-winged teal                  |
| OQ734885 | 1 (PB2) | USA            | A/red-tailed hawk/Kansas/W22-1226/2022                  | red-tailed hawk                   |
| OQ734909 | 1 (PB2) | USA            | A/Cooper's hawk/Kansas/W22-1206/2022                    | Cooper's hawk                     |
| OQ734925 | 1 (PB2) | USA            | A/brown pelican/North Carolina/W23-019/2022             | brown pelican                     |
| OQ734944 | 1 (PB2) | USA            | A/herring gull/North Carolina/W1215B/2022               | herring gull                      |
| OQ734971 | 1 (PB2) | USA            | A/black vulture/North Carolina/W22-1213/2022            | black vulture                     |
| OQ734979 | 1 (PB2) | USA            | A/bald eagle/Virginia/W22-1222/2022                     | bald eagle                        |
| OQ737776 | 1 (PB2) | USA            | A/great black-backed gull/North Carolina/W22-1215A/2022 | great black-backed gull           |
| OQ851654 | 1 (PB2) | USA            | A/Pekin duck/California/T2202390/2022                   | Pekin duck                        |
| OQ954543 | 1 (PB2) | USA            | A/black vulture/Louisiana/W23-166/2023                  | black vulture                     |
| OQ982395 | 1 (PB2) | USA            | A/mallard duck/Minnesota/UGAI22-3846/2022               | mallard duck                      |
| OQ982411 | 1 (PB2) | USA            | A/blue-winged teal/Louisiana/UGAI22-3889/2022           | blue-winged teal                  |
| OQ982419 | 1 (PB2) | USA            | A/blue-winged teal/Minnesota/UGAI22-3834/2022           | blue-winged teal                  |
| OQ982427 | 1 (PB2) | USA            | A/blue-winged teal/Louisiana/UGAI22-3875/2022           | blue-winged teal                  |
| MW873715 | 1 (PB2) | USA            | A/mallard/Alaska/AK20-526/2020(H5N2)                    | mallard                           |
| MZ564969 | 1 (PB2) | Mexico         | A/chicken/Jalisco/CPA-03604-19/2020(H5N2)               | chicken                           |
| OL461745 | 1 (PB2) | USA            | A/mallard/Oregon/AH0192864/2021(H5N2)                   | mallard; live bird surveillance   |
| OM965818 | 1 (PB2) | USA            | A/Sanderling/Delaware/518/2021(H5N2)                    | Calidris alba                     |
| OQ366643 | 1 (PB2) | USA            | A/Ruddy Turnstone/DE/495/2022                           | Ruddy Turnstone                   |
| OQ366658 | 1 (PB2) | USA            | A/Ruddy Turnstone/DE/464/2022                           | Ruddy Turnstone                   |
| MW875337 | 1 (PB2) | USA            | A/Red knot/Delaware Bay/404/2020(H5N3)                  | Calidris canutus                  |
| OL514115 | 1 (PB2) | USA            | A/mallard/Vermont/AH0188057/2021(H5N3)                  | mallard; live bird surveillance   |
| OL514123 | 1 (PB2) | USA            | A/mallard/Vermont/AH0188065/2021(H5N3)                  | mallard; live bird surveillance   |
| OL514155 | 1 (PB2) | USA            | A/mallard/New York/AH0179308/2021(H5N3)                 | mallard; live bird surveillance   |
| OL514218 | 1 (PB2) | USA            | A/mallard/Vermont/AH0188140/2021(H5N3)                  | mallard; live bird surveillance   |
| OL539333 | 1 (PB2) | USA            | A/mallard/Maine/AH0179819/2021(H5N3)                    | mallard; live bird surveillance   |
| OL539626 | 1 (PB2) | USA            | A/mallard/New York/AH0179389/2021(H5N3)                 | mallard; live bird surveillance   |
| OL583750 | 1 (PB2) | USA            | A/mallard/New Hampshire/AH0190828/2021(H5N3)            | mallard; live bird surveillance   |
| OL422845 | 1 (PB2) | USA            | A/mallard/New York/AH0179249/2021(H5N4)                 | mallard; live bird surveillance   |
| MW875202 | 1 (PB2) | USA            | A/ruddy turnstone/Delaware Bay/374/2020(H5N9)           | Arenaria interpres                |
| MW875333 | 1 (PB2) | USA            | A/ruddy turnstone/Delaware Bay/386/2020(H5N9)           | Arenaria interpres                |
| OL638151 | 2 (PB1) | Czech Republic | A/goose/Czech Republic/18520-2/2021(H5N1)               | goose                             |
| OP269961 | 2 (PB1) | USA            | A/Vulpes vulpes/USA                                     | Vulpes vulpes                     |
| OP270004 | 2 (PB1) | USA            | A/Vulpes vulpes/USA                                     | Vulpes vulpes                     |
| OP270017 | 2 (PB1) | USA            | A/Vulpes vulpes/USA                                     | Vulpes vulpes                     |
| OP377532 | 2 (PB1) | USA            | A/common eiders/Maine/W22-481B/2022(H5N1)               | Somateria mollissima              |
| OP499859 | 2 (PB1) | USA            | A/Lesser scaup/MD/LC-EESC-024/2022(H5N1)                | Aythya affinis                    |
| OP597617 | 2 (PB1) | Russia         | A/common teal/Chelyabinsk/1379-1/2021(H5N1)             | common teal                       |
| OP597625 | 2 (PB1) | Russia         | A/goose/Chelyabinsk/1341-3/2021(H5N1)                   | goose                             |
| OP597641 | 2 (PB1) | Russia         | A/pelican/Tumen/932-1/2021(H5N1)                        | pelican                           |
| OP691322 | 2 (PB1) | Mexico         | A/Falco_rusticolus/EdoMex/CPA-19638-22/2022(H5N1)       | Falco_rusticolus                  |
| OQ584502 | 2 (PB1) | USA            | A/black vulture/Georgia/W22-723A/2022(H5N1)             | Coragyps atratus                  |
| OQ584580 | 2 (PB1) | USA            | A/black vulture/South Carolina/W22-623/2022(H5N1)       | Coragyps atratus                  |
| OQ632843 | 2 (PB1) | France         | A/Pekin-duck/France/22005/2022(H5N1)                    | Pekin-duck                        |
| OQ734916 | 2 (PB1) | USA            | A/great-tailed grackle/Kansas/W22-1223C/2022(H5N1)      | Quiscalus mexicanus               |
| OQ734955 | 2 (PB1) | USA            | A/great-tailed grackle/Kansas/W22-1223B/2022(H5N1)      | Quiscalus mexicanus               |
| OQ734962 | 2 (PB1) | USA            | A/great-tailed grackle/Kansas/W22-1223A/2022(H5N1)      | Quiscalus mexicanus               |
| OR125153 | 2 (PB1) | Chile          | A/South American tern/Maule/238507/2023(H5N1)           | Sterna hirundinacea               |
| OR125173 | 2 (PB1) | Chile          | A/chicken/Nuble/239136/2023(H5N1)                       | Gallus gallus                     |
| OR125199 | 2 (PB1) | Chile          | A/chicken/Nuble/240155/2023(H5N1)                       | Gallus gallus                     |
| OR125267 | 2 (PB1) | Chile          | A/Pelican/Valparaiso/233091-2/2023(H5N1)                | Pelecanus sp.                     |
| OR125291 | 2 (PB1) | Chile          | A/Pelican/Valparaiso/233450-1/2023(H5N1)                | Pelecanus sp.                     |
| OR125311 | 2 (PB1) | Chile          | A/Pelican/Atacama/229424-2/2022(H5N1)                   | Pelecanus sp.                     |
| OR125317 | 2 (PB1) | Chile          | A/chicken/OHiggins/241252-6/2023(H5N1)                  | Gallus gallus                     |
| OR125333 | 2 (PB1) | Chile          | A/goose/Araucania/239189-1/2023(H5N1)                   | Anser sp.                         |
| OR125360 | 2 (PB1) | Chile          | A/Chiloe wigeon/OHiggins/240893-2/2023(H5N1)            | Mareca sibilatrix                 |
| OR125382 | 2 (PB1) | Chile          | A/chicken/Nuble/241681-1/2023(H5N1)                     | Gallus gallus                     |
| OR125438 | 2 (PB1) | Chile          | A/Domestic duck/Maule/240466-1/2023(H5N1)               | Anas platyrhynchos domesticus     |
| OR136530 | 2 (PB1) | USA            | A/Swan/OH/OH22-22368-2/2022(H5N1)                       | Swan; Cygnus sp.                  |
| OR136562 | 2 (PB1) | USA            | A/chicken/OH/OH22-20542-2/2022(H5N1)                    | Chicken; Gallus gallus domesticus |
| OR136594 | 2 (PB1) | USA            | A/chicken/OH/OH22-26275-3/2022(H5N1)                    | Chicken; Gallus gallus domesticus |
| OR136602 | 2 (PB1) | USA            | A/chicken/OH/OH22-7075/2022(H5N1)                       | Chicken; Gallus gallus domesticus |
| OR136615 | 2 (PB1) | USA            | A/goose/OH/OH22-21298/2022(H5N1)                        | Goose; Anser cygnoides domesticus |
| OR165028 | 2 (PB1) | USA            | A/common eider/Massachusetts/W22-438D/2022(H5N1)        | Somateria mollissima              |
| OR165068 | 2 (PB1) | USA            | A/black vulture/Georgia/W22-406/2022(H5N1)              | Coragyps atratus                  |
| OR165076 | 2 (PB1) | USA            | A/black vulture/Georgia/W22-487/2022(H5N1)              | Coragyps atratus                  |
| OP221291 | 2 (PB1) | USA            | A/snow goose/Kansas/W22-199D/2022                       | snow goose                        |
| OP221316 | 2 (PB1) | USA            | A/bald eagle/Florida/W22-191/2022                       | bald eagle                        |
| OP221333 | 2 (PB1) | USA            | A/bald eagle/Florida/W22-195/2022                       | bald eagle                        |
| OP221348 | 2 (PB1) | USA            | A/American pelican/Kansas/W22-200/2022                  | American pelican                  |
| OP221372 | 2 (PB1) | USA            | A/bald eagle/South Carolina/W22-205/2022                | bald eagle                        |
| OP222197 | 2 (PB1) | USA            | A/bald eagle/Florida/W22-189/2022                       | bald eagle                        |
| OP377328 | 2 (PB1) | USA            | A/snow goose/North Dakota/N22-06/2022                   | snow goose                        |
| OP377336 | 2 (PB1) | USA            | A/snow goose/North Dakota/N22-04/2022                   | snow goose                        |
| OP377344 | 2 (PB1) | USA            | A/black vulture/Virginia/W22-499C/2022                  | black vulture                     |
| OP377402 | 2 (PB1) | USA            | A/muscovy duck/Florida/W22-306/2022                     | muscovy duck                      |
| OP377410 | 2 (PB1) | USA            | A/bald eagle/North Carolina/W22-186/2022                | bald eagle                        |
| OP377426 | 2 (PB1) | USA            | A/gull/Florida/W22-162/2022                             | gull                              |
| OP377508 | 2 (PB1) | USA            | A/common tern/Maine/W22-480A/2022                       | common tern                       |
| OP377524 | 2 (PB1) | USA            | A/snow goose/Kansas/W22-260/2022                        | snow goose                        |
| OP377564 | 2 (PB1) | USA            | A/black vulture/North Carolina/W22-367C/2022            | black vulture                     |
| OP377588 | 2 (PB1) | USA            | A/lesser snow goose/North Dakota/ND-10/2022             | lesser snow goose                 |
| OP377628 | 2 (PB1) | USA            | A/bald eagle/North Carolina/W22-140/2022                | bald eagle                        |
| OP377636 | 2 (PB1) | USA            | A/hooded merganser/Florida/W22-154/2022                 | hooded merganser                  |
| OP470763 | 2 (PB1) | USA            | A/lesser scaup/Georgia/W22-145D/2022                    | lesser scaup                      |
| OP470771 | 2 (PB1) | USA            | A/lesser scaup/Georgia/W22-143/2022                     | lesser scaup                      |
| OP470787 | 2 (PB1) | USA            | A/lesser scaup/Georgia/W22-145E/2022                    | lesser scaup                      |
| OP470795 | 2 (PB1) | USA            | A/snow goose/Kentucky/W22-092/2022                      | snow goose                        |
| OP950295 | 2 (PB1) | Venezuela      | A/Pelecanus occidentalis/Venezuela/Pel3S2/2022          | Pelecanus occidentalis            |
| OQ352546 | 2 (PB1) | Chile          | A/black skimmer/Chile/C61962/2022                       | black skimmer                     |
| OQ352554 | 2 (PB1) | Chile          | A/gray gull/Chile/C61947/2022                           | gray gull                         |
| OQ455435 | 2 (PB1) | Chile          | A/Gull/CHL/227023-2/2022                                | Gull                              |
| OQ455440 | 2 (PB1) | Chile          | A/Gull/CHL/227023-3/2022                                | Gull                              |
| OQ455445 | 2 (PB1) | Chile          | A/Pelican/CHL/226618-2/2022                             | Pelican                           |
| OQ547341 | 2 (PB1) | Peru           | A/Gallus gallus/Peru/AIS0539/2022                       | Gallus gallus                     |
| OQ547389 | 2 (PB1) | Peru           | A/Gallus gallus/Peru/AIS0548/2022                       | Gallus gallus                     |
| OQ565626 | 2 (PB1) | Peru           | A/Pelecanus/Peru/VFAR-140/2022                          | Pelecanus                         |
| OQ584526 | 2 (PB1) | USA            | A/black vulture/Georgia/W22-404A/2022                   | black vulture                     |
| OQ584542 | 2 (PB1) | USA            | A/black vulture/South Carolina/W22-689B/2022            | black vulture                     |
| OQ584636 | 2 (PB1) | USA            | A/bald eagle/Kansas/W22-384/2022                        | bald eagle                        |
| OQ584684 | 2 (PB1) | USA            | A/black vulture/Georgia/W22-749B/2022                   | black vulture                     |
| OQ584707 | 2 (PB1) | USA            | A/black vulture/Virginia/W22-667C/2022                  | black vulture                     |
| OQ584731 | 2 (PB1) | USA            | A/black vulture/Georgia/W22-404B/2022                   | black vulture                     |
| OQ584739 | 2 (PB1) | USA            | A/black vulture/Georgia/W22-395/2022                    | black vulture                     |
| OQ632897 | 2 (PB1) | France         | A/chicken/France/21328/2021                             | chicken                           |
| OQ683456 | 2 (PB1) | Colombia       | A/chicken/Colombia/Bolivar/3500/2022                    | chicken                           |
| OQ683480 | 2 (PB1) | Colombia       | A/chicken/Colombia/Cordoba/3499/2022                    | chicken                           |



|          |         |                |                                                         |                                     |
|----------|---------|----------------|---------------------------------------------------------|-------------------------------------|
| OQ683488 | 2 (PB1) | Colombia       | A/chicken/Colombia/Magdalena/3503/2022                  | chicken                             |
| OQ683496 | 2 (PB1) | Colombia       | A/wild duck/Colombia/Choco/3501/2022                    | wild duck                           |
| OQ694852 | 2 (PB1) | USA            | A/snow goose/Kansas/W22-1143/2022                       | snow goose                          |
| OQ694860 | 2 (PB1) | USA            | A/black vulture/North Carolina/W22-1078/2022            | black vulture                       |
| OQ694868 | 2 (PB1) | USA            | A/black vulture/South Carolina/W22-1112/2022            | black vulture                       |
| OQ694876 | 2 (PB1) | USA            | A/black vulture/South Carolina/W22-1080B/2022           | black vulture                       |
| OQ694884 | 2 (PB1) | USA            | A/snow goose/Louisiana/W22-1163/2022                    | snow goose                          |
| OQ694892 | 2 (PB1) | USA            | A/black vulture/Georgia/W22-1049/2022                   | black vulture                       |
| OQ694926 | 2 (PB1) | USA            | A/maillard/North Carolina/W22-1114A/2022                | maillard                            |
| OQ694934 | 2 (PB1) | USA            | A/snow goose/Louisiana/W22-1146A/2022                   | snow goose                          |
| OQ694958 | 2 (PB1) | USA            | A/black vulture/Tennessee/W22-1149/2022                 | black vulture                       |
| OQ696058 | 2 (PB1) | USA            | A/Ross's goose/Kansas/W22-1154/2022                     | Ross's goose                        |
| OQ732946 | 2 (PB1) | USA            | A/black vulture/Georgia/W22-969B/2022                   | black vulture                       |
| OQ732962 | 2 (PB1) | USA            | A/blue-winged teal/Minnesota/AV22-690/2022              | blue-winged teal                    |
| OQ732970 | 2 (PB1) | USA            | A/red-tailed hawk/Kentucky/W23-143/2022                 | red-tailed hawk                     |
| OQ732978 | 2 (PB1) | USA            | A/blue-winged teal/Texas/UGAI22-2966/2022               | blue-winged teal                    |
| OQ732986 | 2 (PB1) | USA            | A/black vulture/Georgia/W22-933C/2022                   | black vulture                       |
| OQ733002 | 2 (PB1) | USA            | A/blue-winged teal/Texas/UGAI22-3268/2022               | blue-winged teal                    |
| OQ733010 | 2 (PB1) | USA            | A/blue-winged teal/Minnesota/UGAI22-3620/2022           | blue-winged teal                    |
| OQ733034 | 2 (PB1) | USA            | A/blue-winged teal/Texas/UGAI22-3189/2022               | blue-winged teal                    |
| OQ733066 | 2 (PB1) | USA            | A/black vulture/Georgia/W22-972A/2022                   | black vulture                       |
| OQ733074 | 2 (PB1) | USA            | A/bald eagle/South Carolina/W23-142A/2023               | bald eagle                          |
| OQ733082 | 2 (PB1) | USA            | A/blue-winged teal/Texas/UGAI22-3226/2022               | blue-winged teal                    |
| OQ733114 | 2 (PB1) | USA            | A/blue-winged teal/Texas/UGAI22-2961/2022               | blue-winged teal                    |
| OQ733122 | 2 (PB1) | USA            | A/black vulture/Georgia/W22-1056A/2022                  | black vulture                       |
| OQ733154 | 2 (PB1) | USA            | A/blue-winged teal/Minnesota/AV22-680/2022              | blue-winged teal                    |
| OQ734892 | 2 (PB1) | USA            | A/bald eagle/Tennessee/W23-003/2022                     | bald eagle                          |
| OQ734900 | 2 (PB1) | USA            | A/American green-winged teal/Texas/UGAI22-3462/2022     | American green-winged teal          |
| OQ734908 | 2 (PB1) | USA            | A/Cooper's hawk/Kansas/W22-1206/2022                    | Cooper's hawk                       |
| OQ734924 | 2 (PB1) | USA            | A/brown pelican/North Carolina/W23-019/2022             | brown pelican                       |
| OQ734943 | 2 (PB1) | USA            | A/herring gull/North Carolina/W1215B/2022               | herring gull                        |
| OQ734970 | 2 (PB1) | USA            | A/black vulture/North Carolina/W22-1213/2022            | black vulture                       |
| OQ734978 | 2 (PB1) | USA            | A/bald eagle/Virginia/W22-1222/2022                     | bald eagle                          |
| OQ737775 | 2 (PB1) | USA            | A/great black-backed gull/North Carolina/W22-1215A/2022 | great black-backed gull             |
| OQ747878 | 2 (PB1) | Peru           | A/Peruvian pelican/Peru/A074/2022                       | Peruvian pelican                    |
| OQ747883 | 2 (PB1) | Peru           | A/Western barn owl/Peru/A293/2022                       | Western barn owl                    |
| OQ851653 | 2 (PB1) | USA            | A/Pekin duck/California/T2202390/2022                   | Pekin duck                          |
| OQ954534 | 2 (PB1) | USA            | A/bald eagle/South Carolina/W23-201B/2023               | bald eagle                          |
| OQ982402 | 2 (PB1) | USA            | A/bald eagle/North Carolina/W23-012/2022                | bald eagle                          |
| OQ982410 | 2 (PB1) | USA            | A/blue-winged teal/Louisiana/UGAI22-3889/2022           | blue-winged teal                    |
| OQ982418 | 2 (PB1) | USA            | A/blue-winged teal/Minnesota/UGAI22-3834/2022           | blue-winged teal                    |
| OQ982426 | 2 (PB1) | USA            | A/blue-winged teal/Louisiana/UGAI22-3875/2022           | blue-winged teal                    |
| OL636397 | 3 (PA)  | Czech Republic | A/goose/Czech Republic/18520-1/2021(H5N1)               | goose                               |
| OP269953 | 3 (PA)  | USA            | A/Vulpes vulpes/USA                                     | Vulpes vulpes                       |
| OP377531 | 3 (PA)  | USA            | A/common eiders/Maine/W22-481B/2022(H5N1)               | Somateria mollissima                |
| OP499860 | 3 (PA)  | USA            | A/Lesser scaup/MD/LC-EESC-024/2022(H5N1)                | Aythya affinis                      |
| OP597616 | 3 (PA)  | Russia         | A/common teal/Chelyabinsk/1379-1/2021(H5N1)             | common teal                         |
| OP597624 | 3 (PA)  | Russia         | A/goose/Chelyabinsk/1341-3/2021(H5N1)                   | goose                               |
| OP597632 | 3 (PA)  | Russia         | A/pelican/Tumen/1032-1/2021(H5N1)                       | pelican                             |
| OP691323 | 3 (PA)  | Mexico         | A/Falco rusticolus/EdoMex/CPA-19638-22/2022(H5N1)       | Falco rusticolus                    |
| OP698127 | 3 (PA)  | USA            | A/bottlenose dolphin/Florida/UFT12203/2022(H5N1)        | Tursiops truncatus                  |
| OQ584501 | 3 (PA)  | USA            | A/black vulture/Georgia/W22-723A/2022(H5N1)             | Coragyps atratus                    |
| OQ595414 | 3 (PA)  | USA            | A/bald eagle/North Carolina/W22-729/2022(H5N1)          | Haliaeetus leucocephalus            |
| OQ730468 | 3 (PA)  | USA            | A/harbor seal/Maine/MME-22-150Pv-ns/2022(H5N1)          | Phoca vitulina                      |
| OQ730492 | 3 (PA)  | USA            | A/harbor seal/Maine/MME-22-117Pv-ns/2022(H5N1)          | Phoca vitulina                      |
| OQ732939 | 3 (PA)  | USA            | A/harbor seal/Maine/MME-22-147Pv-L/2022(H5N1)           | Phoca vitulina                      |
| OQ733089 | 3 (PA)  | USA            | A/striped skunk/Kansas/W23-094/2023(H5N1)               | Mephitis mephitis                   |
| OQ734915 | 3 (PA)  | USA            | A/great-tailed grackle/Kansas/W22-1223C/2022(H5N1)      | Quiscalus mexicanus                 |
| OQ734953 | 3 (PA)  | USA            | A/great-tailed grackle/Kansas/W22-1223B/2022(H5N1)      | Quiscalus mexicanus                 |
| OQ734961 | 3 (PA)  | USA            | A/great-tailed grackle/Kansas/W22-1223A/2022(H5N1)      | Quiscalus mexicanus                 |
| OQ954549 | 3 (PA)  | USA            | A/striped skunk/Kansas/W23-175/2023(H5N1)               | Mephitis mephitis                   |
| OR125140 | 3 (PA)  | Chile          | A/chicken/Nuble/240684/2023(H5N1)                       | Gallus gallus                       |
| OR125187 | 3 (PA)  | Chile          | A/Sanderling/Arica y Parinacota/240265/2023(H5N1)       | Calidris alba                       |
| OR125200 | 3 (PA)  | Chile          | A/chicken/Nuble/240155/2023(H5N1)                       | Gallus gallus                       |
| OR125243 | 3 (PA)  | Chile          | A/chicken/OHiggins/241252-3/2023(H5N1)                  | Gallus gallus                       |
| OR125268 | 3 (PA)  | Chile          | A/Pelican/Valparaiso/233091-2/2023(H5N1)                | Pelecanus sp.                       |
| OR125439 | 3 (PA)  | Chile          | A/Domestic duck/Maule/240466-1/2023(H5N1)               | Anas platyrhynchos domesticus       |
| OR125476 | 3 (PA)  | Chile          | A/Humboldt penguin/Tarapaca/238744-2/2023(H5N1)         | Spheniscus humboldti                |
| OR136523 | 3 (PA)  | USA            | A/Silver Pheasant/OH/OH22-20552/2022(H5N1)              | Silver Pheasant; Lophura nycthemera |
| OR136531 | 3 (PA)  | USA            | A/Swan/OH/OH22-22368-2/2022(H5N1)                       | Swan; Cygnus sp.                    |
| OR136547 | 3 (PA)  | USA            | A/Wood Duck/OH/OH22-20551/2022(H5N1)                    | Wood Duck; Aix sponsa               |
| OR136555 | 3 (PA)  | USA            | A/chicken/OH/OH22-20542-1/2022(H5N1)                    | Chicken; Gallus gallus domesticus   |
| OR136571 | 3 (PA)  | USA            | A/chicken/OH/OH22-21172-2/2022(H5N1)                    | Chicken; Gallus gallus domesticus   |
| OR136579 | 3 (PA)  | USA            | A/chicken/OH/OH22-26275-1/2022(H5N1)                    | Chicken; Gallus gallus domesticus   |
| OR136587 | 3 (PA)  | USA            | A/chicken/OH/OH22-26275-2/2022(H5N1)                    | Chicken; Gallus gallus domesticus   |
| OR136595 | 3 (PA)  | USA            | A/chicken/OH/OH22-26275-3/2022(H5N1)                    | Chicken; Gallus gallus domesticus   |
| OR136603 | 3 (PA)  | USA            | A/chicken/OH/OH22-7075/2022(H5N1)                       | Chicken; Gallus gallus domesticus   |
| OR136614 | 3 (PA)  | USA            | A/goose/OH/OH22-21298/2022(H5N1)                        | Goose; Anser cygnoides domesticus   |
| OR165067 | 3 (PA)  | USA            | A/black vulture/Georgia/W22-406/2022(H5N1)              | Coragyps atratus                    |
| OR165075 | 3 (PA)  | USA            | A/black vulture/Georgia/W22-487/2022(H5N1)              | Coragyps atratus                    |
| OP221046 | 3 (PA)  | USA            | A/bald eagle/Kansas/W22-197/2022                        | bald eagle                          |
| OP221290 | 3 (PA)  | USA            | A/snow goose/Kansas/W22-199D/2022                       | snow goose                          |
| OP221298 | 3 (PA)  | USA            | A/snow goose/Kansas/W22-199F/2022                       | snow goose                          |
| OP221306 | 3 (PA)  | USA            | A/bald eagle/Georgia/W22-194B/2022                      | bald eagle                          |
| OP221332 | 3 (PA)  | USA            | A/bald eagle/Florida/W22-195/2022                       | bald eagle                          |
| OP221355 | 3 (PA)  | USA            | A/snow goose/Kansas/W22-199A/2022                       | snow goose                          |
| OP221387 | 3 (PA)  | USA            | A/bald eagle/Georgia/W22-194A/2022                      | bald eagle                          |
| OP222198 | 3 (PA)  | USA            | A/American pelican/Kansas/W22-200/2022                  | American pelican                    |
| OP377335 | 3 (PA)  | USA            | A/snow goose/North Dakota/N22-04/2022                   | snow goose                          |
| OP377401 | 3 (PA)  | USA            | A/muscovy duck/Florida/W22-306/2022                     | muscovy duck                        |
| OP377417 | 3 (PA)  | USA            | A/royal tern/Florida/W22-245B/2022                      | royal tern                          |
| OP377425 | 3 (PA)  | USA            | A/gull/Florida/W22-162/2022                             | gull                                |
| OP377441 | 3 (PA)  | USA            | A/bald eagle/Florida/W22-134-OP/2022                    | bald eagle                          |
| OP377507 | 3 (PA)  | USA            | A/common tern/Maine/W22-480A/2022                       | common tern                         |
| OP377547 | 3 (PA)  | USA            | A/great blue heron/Florida/W22-160/2022                 | great blue heron                    |
| OP377563 | 3 (PA)  | USA            | A/black vulture/North Carolina/W22-367C/2022            | black vulture                       |
| OP377587 | 3 (PA)  | USA            | A/lesser snow goose/North Dakota/ND-10/2022             | lesser snow goose                   |
| OP377611 | 3 (PA)  | USA            | A/brown pelican/North Carolina/W22-164/2022             | brown pelican                       |
| OP377627 | 3 (PA)  | USA            | A/bald eagle/North Carolina/W22-140/2022                | bald eagle                          |
| OP377635 | 3 (PA)  | USA            | A/hooded merganser/Florida/W22-154/2022                 | hooded merganser                    |
| OP470754 | 3 (PA)  | USA            | A/lesser scaup/Georgia/W22-145B/2022                    | lesser scaup                        |
| OP950296 | 3 (PA)  | Venezuela      | A/Pelecanus occidentalis/Venezuela/Pel3S3/2022          | Pelecanus occidentalis              |
| OP950304 | 3 (PA)  | Venezuela      | A/Pelecanus occidentalis/Venezuela/Pel4S3/2022          | Pelecanus occidentalis              |
| OQ352540 | 3 (PA)  | Chile          | A/Peruvian pelican/Chile/C61740/2022                    | Peruvian pelican                    |
| OQ352547 | 3 (PA)  | Chile          | A/black skimmer/Chile/C61962/2022                       | black skimmer                       |
| OQ455405 | 3 (PA)  | Chile          | A/Pelican/CHL/226958-1/2022                             | Pelican                             |
| OQ455432 | 3 (PA)  | Chile          | A/Pelican/CHL/226618-1/2022                             | Pelican                             |
| OQ455441 | 3 (PA)  | Chile          | A/Gull/CHL/227023-3/2022                                | Gull                                |

|          |        |           |                                                          |                            |
|----------|--------|-----------|----------------------------------------------------------|----------------------------|
| OQ455446 | 3 (PA) | Chile     | A/Pelican/CHL/226618-2/2022                              | Pelican                    |
| OQ455465 | 3 (PA) | Chile     | A/Pelican/CHL/226924-1/2022                              | Pelican                    |
| OQ547334 | 3 (PA) | Peru      | A/Pelecanus thagus/Peru/AIS0541/2022                     | Pelecanus thagus           |
| OQ547358 | 3 (PA) | Peru      | A/Gallus gallus/Peru/AIS0542/2022                        | Gallus gallus              |
| OQ547374 | 3 (PA) | Peru      | A/Gallus gallus/Peru/AIS0544/2022                        | Gallus gallus              |
| OQ547390 | 3 (PA) | Peru      | A/Gallus gallus/Peru/AIS0548/2022                        | Gallus gallus              |
| OQ565627 | 3 (PA) | Peru      | A/Pelecanus/Peru/VFAR-140/2022                           | Pelecanus                  |
| OQ584509 | 3 (PA) | USA       | A/black vulture/Georgia/W22-769/2022                     | black vulture              |
| OQ584517 | 3 (PA) | USA       | A/black vulture/Georgia/W22-722B/2022                    | black vulture              |
| OQ584549 | 3 (PA) | USA       | A/black vulture/Georgia/W22-675B/2022                    | black vulture              |
| OQ584557 | 3 (PA) | USA       | A/black vulture/Georgia/W22-619A/2022                    | black vulture              |
| OQ584611 | 3 (PA) | USA       | A/black vulture/Georgia/W22-722C/2022                    | black vulture              |
| OQ584714 | 3 (PA) | USA       | A/black vulture/Georgia/W22-749A/2022                    | black vulture              |
| OQ584730 | 3 (PA) | USA       | A/black vulture/Georgia/W22-404B/2022                    | black vulture              |
| OQ632898 | 3 (PA) | France    | A/chicken/France/21328/2021                              | chicken                    |
| OQ683457 | 3 (PA) | Colombia  | A/chicken/Colombia/Bolivar/3500/2022                     | chicken                    |
| OQ683473 | 3 (PA) | Colombia  | A/chicken/Colombia/Choco/3504/2022                       | chicken                    |
| OQ683481 | 3 (PA) | Colombia  | A/chicken/Colombia/Cordoba/3499/2022                     | chicken                    |
| OQ683489 | 3 (PA) | Colombia  | A/chicken/Colombia/Magdalena/3503/2022                   | chicken                    |
| OQ694811 | 3 (PA) | USA       | A/black vulture/Georgia/W22-1048/2022                    | black vulture              |
| OQ694851 | 3 (PA) | USA       | A/snow goose/Kansas/W22-1143/2022                        | snow goose                 |
| OQ694859 | 3 (PA) | USA       | A/black vulture/North Carolina/W22-1078/2022             | black vulture              |
| OQ694867 | 3 (PA) | USA       | A/black vulture/South Carolina/W22-1112/2022             | black vulture              |
| OQ694891 | 3 (PA) | USA       | A/black vulture/Georgia/W22-1049/2022                    | black vulture              |
| OQ694899 | 3 (PA) | USA       | A/black vulture/Georgia/W22-1057B/2022                   | black vulture              |
| OQ694907 | 3 (PA) | USA       | A/Canada goose/North Carolina/W22-1055/2022              | Canada goose               |
| OQ694917 | 3 (PA) | USA       | A/black vulture/Georgia/W22-1057D/2022                   | black vulture              |
| OQ694925 | 3 (PA) | USA       | A/mallard/North Carolina/W22-1114A/2022                  | mallard                    |
| OQ694933 | 3 (PA) | USA       | A/snow goose/Louisiana/W22-1146A/2022                    | snow goose                 |
| OQ696057 | 3 (PA) | USA       | A/Ross's goose/Kansas/W22-1154/2022                      | Ross's goose               |
| OQ696068 | 3 (PA) | USA       | A/red-tailed hawk/Kansas/W22-1155/2022                   | red-tailed hawk            |
| OQ732953 | 3 (PA) | USA       | A/black vulture/South Carolina/W22-1080A/2022            | black vulture              |
| OQ732961 | 3 (PA) | USA       | A/blue-winged teal/Minnesota/AV22-690/2022               | blue-winged teal           |
| OQ732969 | 3 (PA) | USA       | A/red-tailed hawk/Kentucky/W23-143/2022                  | red-tailed hawk            |
| OQ732977 | 3 (PA) | USA       | A/blue-winged teal/Texas/UGAI22-2966/2022                | blue-winged teal           |
| OQ732985 | 3 (PA) | USA       | A/black vulture/Georgia/W22-933C/2022                    | black vulture              |
| OQ733001 | 3 (PA) | USA       | A/blue-winged teal/Texas/UGAI22-3268/2022                | blue-winged teal           |
| OQ733009 | 3 (PA) | USA       | A/blue-winged teal/Minnesota/UGAI22-3620/2022            | blue-winged teal           |
| OQ733049 | 3 (PA) | USA       | A/black vulture/North Carolina/W22-1079C/2022            | black vulture              |
| OQ733065 | 3 (PA) | USA       | A/black vulture/Georgia/W22-972A/2022                    | black vulture              |
| OQ733073 | 3 (PA) | USA       | A/bald eagle/South Carolina/W23-142A/2023                | bald eagle                 |
| OQ733081 | 3 (PA) | USA       | A/blue-winged teal/Texas/UGAI22-3226/2022                | blue-winged teal           |
| OQ733113 | 3 (PA) | USA       | A/blue-winged teal/Texas/UGAI22-2961/2022                | blue-winged teal           |
| OQ733129 | 3 (PA) | USA       | A/blue-winged teal/Minnesota/UGAI22-3611/2022            | blue-winged teal           |
| OQ733137 | 3 (PA) | USA       | A/black vulture/Louisiana/W23-118/2023                   | black vulture              |
| OQ733153 | 3 (PA) | USA       | A/blue-winged teal/Minnesota/AV22-680/2022               | blue-winged teal           |
| OQ734883 | 3 (PA) | USA       | A/red-tailed hawk/Kansas/W22-1226/2022                   | red-tailed hawk            |
| OQ734891 | 3 (PA) | USA       | A/bald eagle/Tennessee/W23-003/2022                      | bald eagle                 |
| OQ734899 | 3 (PA) | USA       | A/American green-winged teal/Texas/UGAI22-3462/2022      | American green-winged teal |
| OQ734907 | 3 (PA) | USA       | A/Cooper's hawk/Kansas/W22-1206/2022                     | Cooper's hawk              |
| OQ734923 | 3 (PA) | USA       | A/brown pelican/North Carolina/W23-019/2022              | brown pelican              |
| OQ734931 | 3 (PA) | USA       | A/double-crested cormorant/North Carolina/W22-1215C/2022 | double-crested cormorant   |
| OQ734942 | 3 (PA) | USA       | A/herring gull/North Carolina/W1215B/2022                | herring gull               |
| OQ734969 | 3 (PA) | USA       | A/black vulture/North Carolina/W22-1213/2022             | black vulture              |
| OQ747873 | 3 (PA) | Peru      | A/Peruvian pelican/Peru/A074/2022                        | Peruvian pelican           |
| OQ851652 | 3 (PA) | USA       | A/Pekin duck/California/T2202390/2022                    | Pekin duck                 |
| OQ982401 | 3 (PA) | USA       | A/bald eagle/North Carolina/W23-012/2022                 | bald eagle                 |
| OQ982409 | 3 (PA) | USA       | A/blue-winged teal/Louisiana/UGAI22-3889/2022            | blue-winged teal           |
| OQ982425 | 3 (PA) | USA       | A/blue-winged teal/Louisiana/UGAI22-3875/2022            | blue-winged teal           |
| OP377461 | 4 (HA) | USA       | A/bald eagle/Florida/W22-153B/2022(H5N1)                 | Haliaeetus leucocephalus   |
| OP499861 | 4 (HA) | USA       | A/Lesser scaup/MD/LC-EESC-024/2022(H5N1)                 | Aythya affinis             |
| OQ428779 | 4 (HA) | USA       | A/Anas platyrhynchos/AZ/S1-AZMCP12122022-S4/2022(H5N1)   | Anas platyrhynchos         |
| OQ584560 | 4 (HA) | USA       | A/bald eagle/North Carolina/W22-729/2022(H5N1)           | Haliaeetus leucocephalus   |
| OQ584575 | 4 (HA) | USA       | A/black vulture/South Carolina/W22-623/2022(H5N1)        | Coragyps atratus           |
| OQ584694 | 4 (HA) | USA       | A/black vulture/Georgia/W22-619B/2022(H5N1)              | Coragyps atratus           |
| OQ600260 | 4 (HA) | USA       | A/black vulture/Georgia/W22-723A/2022(H5N1)              | Coragyps atratus           |
| OP221041 | 4 (HA) | USA       | A/bald eagle/Kansas/W22-197/2022                         | bald eagle                 |
| OP221285 | 4 (HA) | USA       | A/snow goose/Kansas/W22-199D/2022                        | snow goose                 |
| OP221301 | 4 (HA) | USA       | A/bald eagle/Georgia/W22-194B/2022                       | bald eagle                 |
| OP221311 | 4 (HA) | USA       | A/bald eagle/Florida/W22-191/2022                        | bald eagle                 |
| OP221327 | 4 (HA) | USA       | A/bald eagle/Florida/W22-195/2022                        | bald eagle                 |
| OP221335 | 4 (HA) | USA       | A/bald eagle/Georgia/W22-202/2022                        | bald eagle                 |
| OP221343 | 4 (HA) | USA       | A/American pelican/Kansas/W22-200/2022                   | American pelican           |
| OP221350 | 4 (HA) | USA       | A/snow goose/Kansas/W22-199A/2022                        | snow goose                 |
| OP377322 | 4 (HA) | USA       | A/snow goose/North Dakota/N22-06/2022                    | snow goose                 |
| OP377330 | 4 (HA) | USA       | A/snow goose/North Dakota/N22-04/2022                    | snow goose                 |
| OP377338 | 4 (HA) | USA       | A/black vulture/Virginia/W22-499C/2022                   | black vulture              |
| OP377380 | 4 (HA) | USA       | A/bald eagle/Virginia/W22-306/2022                       | bald eagle                 |
| OP377396 | 4 (HA) | USA       | A/muscovy duck/Florida/W22-306/2022                      | muscovy duck               |
| OP377412 | 4 (HA) | USA       | A/royal tern/Florida/W22-245B/2022                       | royal tern                 |
| OP377420 | 4 (HA) | USA       | A/gull/Florida/W22-162/2022                              | gull                       |
| OP377445 | 4 (HA) | USA       | A/bald eagle/North Carolina/W22-229/2022                 | bald eagle                 |
| OP377453 | 4 (HA) | USA       | A/black vulture/Florida/W22-168/2022                     | black vulture              |
| OP377486 | 4 (HA) | USA       | A/black vulture/Florida/W22-161/2022                     | black vulture              |
| OP377510 | 4 (HA) | USA       | A/great horned owl/Florida/W22-163A/2022                 | great horned owl           |
| OP377534 | 4 (HA) | USA       | A/bald eagle/Florida/W22-153A/2022                       | bald eagle                 |
| OP377542 | 4 (HA) | USA       | A/great blue heron/Florida/W22-160/2022                  | great blue heron           |
| OP377550 | 4 (HA) | USA       | A/common tern/Maine/W22-480B/2022                        | common tern                |
| OP377558 | 4 (HA) | USA       | A/black vulture/North Carolina/W22-367C/2022             | black vulture              |
| OP377574 | 4 (HA) | USA       | A/black vulture/Florida/W22-167/2022                     | black vulture              |
| OP377582 | 4 (HA) | USA       | A/lesser snow goose/North Dakota/ND-10/2022              | lesser snow goose          |
| OP377590 | 4 (HA) | USA       | A/snow goose/Kansas/W22-174B/2022                        | snow goose                 |
| OP377606 | 4 (HA) | USA       | A/brown pelican/North Carolina/W22-164/2022              | brown pelican              |
| OP377614 | 4 (HA) | USA       | A/royal tern/Florida/W22-245A/2022                       | royal tern                 |
| OP377622 | 4 (HA) | USA       | A/bald eagle/North Carolina/W22-140/2022                 | bald eagle                 |
| OP377630 | 4 (HA) | USA       | A/hooded merganser/Florida/W22-154/2022                  | hooded merganser           |
| OP470716 | 4 (HA) | USA       | A/lesser scaup/Georgia/W22-145C/2022                     | lesser scaup               |
| OP470733 | 4 (HA) | USA       | A/bald eagle/Florida/W22-134-CL/2022                     | bald eagle                 |
| OP470741 | 4 (HA) | USA       | A/bald eagle/FL/W22-114/2022                             | bald eagle                 |
| OP470749 | 4 (HA) | USA       | A/lesser scaup/Georgia/W22-145B/2022                     | lesser scaup               |
| OP470757 | 4 (HA) | USA       | A/lesser scaup/Georgia/W22-145D/2022                     | lesser scaup               |
| OP470765 | 4 (HA) | USA       | A/lesser scaup/Georgia/W22-143/2022                      | lesser scaup               |
| OP470781 | 4 (HA) | USA       | A/lesser scaup/Georgia/W22-145E/2022                     | lesser scaup               |
| OP470789 | 4 (HA) | USA       | A/snow goose/Kentucky/W22-092/2022                       | snow goose                 |
| OP470804 | 4 (HA) | USA       | A/bald eagle/FL/W22-114/2022                             | bald eagle                 |
| OP499866 | 4 (HA) | USA       | A/red-tailed hawk/Kansas/W22-198/2022                    | red-tailed hawk            |
| OP950297 | 4 (HA) | Venezuela | A/Pelecanus occidentalis/Venezuela/Pel3S4/2022           | Pelecanus occidentalis     |
| OP950305 | 4 (HA) | Venezuela | A/Pelecanus occidentalis/Venezuela/Pel4S4/2022           | Pelecanus occidentalis     |



|          |        |          |                                                         |                            |
|----------|--------|----------|---------------------------------------------------------|----------------------------|
| OQ352548 | 4 (HA) | Chile    | A/black skimmer/Chile/C61962/2022                       | black skimmer              |
| OQ352556 | 4 (HA) | Chile    | A/gray gull/Chile/C61947/2022                           | gray gull                  |
| OQ442195 | 4 (HA) | USA      | A/red-shouldered hawk/North Carolina/W22-121/2022       | red-shouldered hawk        |
| OQ455396 | 4 (HA) | Chile    | A/Pelican/CHL/226955-1/2022                             | Pelican                    |
| OQ455401 | 4 (HA) | Chile    | A/Pelican/CHL/226955-3/2022                             | Pelican                    |
| OQ455410 | 4 (HA) | Chile    | A/Pelican/CHL/226618-2/2022                             | Pelican                    |
| OQ455416 | 4 (HA) | Chile    | A/Pelican/CHL/226618-1/2022                             | Pelican                    |
| OQ455422 | 4 (HA) | Chile    | A/Pelican/CHL/226958-1/2022                             | Pelican                    |
| OQ455437 | 4 (HA) | Chile    | A/Gull/CHL/227023-2/2022                                | Gull                       |
| OQ455442 | 4 (HA) | Chile    | A/Gull/CHL/227023-3/2022                                | Gull                       |
| OQ455458 | 4 (HA) | Chile    | A/Pelican/CHL/227087-1/2022                             | Pelican                    |
| OQ455466 | 4 (HA) | Chile    | A/Pelican/CHL/226924-1/2022                             | Pelican                    |
| OQ458189 | 4 (HA) | Chile    | A/Pelican/CHL/227023-1/2022                             | Pelican                    |
| OQ584512 | 4 (HA) | USA      | A/black vulture/Georgia/W22-722B/2022                   | black vulture              |
| OQ584520 | 4 (HA) | USA      | A/black vulture/Georgia/W22-404A/2022                   | black vulture              |
| OQ584528 | 4 (HA) | USA      | A/black vulture/Georgia/W22-750B/2022                   | black vulture              |
| OQ584536 | 4 (HA) | USA      | A/black vulture/South Carolina/W22-689B/2022            | black vulture              |
| OQ584567 | 4 (HA) | USA      | A/black vulture/Georgia/W22-723B/2022                   | black vulture              |
| OQ584598 | 4 (HA) | USA      | A/black vulture/Virginia/W22-662C/2022                  | black vulture              |
| OQ584630 | 4 (HA) | USA      | A/bald eagle/Kansas/W22-384/2022                        | bald eagle                 |
| OQ584638 | 4 (HA) | USA      | A/black vulture/Virginia/W22-667D/2022                  | black vulture              |
| OQ584662 | 4 (HA) | USA      | A/black vulture/Georgia/W22-749C/2022                   | black vulture              |
| OQ584670 | 4 (HA) | USA      | A/black vulture/Georgia/W22-719A/2022                   | black vulture              |
| OQ584686 | 4 (HA) | USA      | A/black vulture/Georgia/W22-750A/2022                   | black vulture              |
| OQ584701 | 4 (HA) | USA      | A/black vulture/Virginia/W22-667C/2022                  | black vulture              |
| OQ584725 | 4 (HA) | USA      | A/black vulture/Georgia/W22-404B/2022                   | black vulture              |
| OQ584791 | 4 (HA) | USA      | A/black vulture/Georgia/W22-719C/2022                   | black vulture              |
| OQ632895 | 4 (HA) | France   | A/chicken/France/21328/2021                             | chicken                    |
| OQ683458 | 4 (HA) | Colombia | A/chicken/Colombia/Bolivar/3500/2022                    | chicken                    |
| OQ683466 | 4 (HA) | Colombia | A/chicken/Colombia/Choco/3502/2022                      | chicken                    |
| OQ683474 | 4 (HA) | Colombia | A/chicken/Colombia/Choco/3504/2022                      | chicken                    |
| OQ683482 | 4 (HA) | Colombia | A/chicken/Colombia/Cordoba/3499/2022                    | chicken                    |
| OQ683490 | 4 (HA) | Colombia | A/chicken/Colombia/Magdalena/3503/2022                  | chicken                    |
| OQ683498 | 4 (HA) | Colombia | A/wild duck/Colombia/Choco/3501/2022                    | wild duck                  |
| OQ694806 | 4 (HA) | USA      | A/black vulture/Georgia/W22-1048/2022                   | black vulture              |
| OQ694846 | 4 (HA) | USA      | A/snow goose/Kansas/W22-1143/2022                       | snow goose                 |
| OQ694854 | 4 (HA) | USA      | A/black vulture/North Carolina/W22-1078/2022            | black vulture              |
| OQ694862 | 4 (HA) | USA      | A/black vulture/South Carolina/W22-1112/2022            | black vulture              |
| OQ694870 | 4 (HA) | USA      | A/black vulture/South Carolina/W22-1080B/2022           | black vulture              |
| OQ694878 | 4 (HA) | USA      | A/snow goose/Louisiana/W22-1163/2022                    | snow goose                 |
| OQ694886 | 4 (HA) | USA      | A/black vulture/Georgia/W22-1049/2022                   | black vulture              |
| OQ694894 | 4 (HA) | USA      | A/black vulture/Georgia/W22-1057B/2022                  | black vulture              |
| OQ694902 | 4 (HA) | USA      | A/Canada goose/North Carolina/W22-1055/2022             | Canada goose               |
| OQ694912 | 4 (HA) | USA      | A/black vulture/Georgia/W22-1057D/2022                  | black vulture              |
| OQ694920 | 4 (HA) | USA      | A/mallard/North Carolina/W22-1114A/2022                 | mallard                    |
| OQ694928 | 4 (HA) | USA      | A/snow goose/Louisiana/W22-1146A/2022                   | snow goose                 |
| OQ694936 | 4 (HA) | USA      | A/black vulture/North Carolina/W22-1051A/2022           | black vulture              |
| OQ694944 | 4 (HA) | USA      | A/black vulture/Tennessee/W22-1150B/2022                | black vulture              |
| OQ694952 | 4 (HA) | USA      | A/black vulture/Tennessee/W22-1149/2022                 | black vulture              |
| OQ696052 | 4 (HA) | USA      | A/Ross's goose/Kansas/W22-1154/2022                     | Ross's goose               |
| OQ696063 | 4 (HA) | USA      | A/red-tailed hawk/Kansas/W22-1155/2022                  | red-tailed hawk            |
| OQ732940 | 4 (HA) | USA      | A/black vulture/Georgia/W22-969B/2022                   | black vulture              |
| OQ732956 | 4 (HA) | USA      | A/blue-winged teal/Minnesota/AV22-690/2022              | blue-winged teal           |
| OQ732964 | 4 (HA) | USA      | A/red-tailed hawk/Kentucky/W23-143/2022                 | red-tailed hawk            |
| OQ732972 | 4 (HA) | USA      | A/blue-winged teal/Texas/UGAI22-2966/2022               | blue-winged teal           |
| OQ732980 | 4 (HA) | USA      | A/black vulture/Georgia/W22-933C/2022                   | black vulture              |
| OQ732988 | 4 (HA) | USA      | A/bald eagle/North Carolina/W23-142B/2023               | bald eagle                 |
| OQ732996 | 4 (HA) | USA      | A/blue-winged teal/Texas/UGAI22-3268/2022               | blue-winged teal           |
| OQ733004 | 4 (HA) | USA      | A/blue-winged teal/Minnesota/UGAI22-3620/2022           | blue-winged teal           |
| OQ733012 | 4 (HA) | USA      | A/blue-winged teal/Texas/UGAI22-3250/2022               | blue-winged teal           |
| OQ733028 | 4 (HA) | USA      | A/blue-winged teal/Texas/UGAI22-3189/2022               | blue-winged teal           |
| OQ733036 | 4 (HA) | USA      | A/blue-winged teal/Minnesota/AV22-675/2022              | blue-winged teal           |
| OQ733044 | 4 (HA) | USA      | A/black vulture/North Carolina/W22-1079C/2022           | black vulture              |
| OQ733052 | 4 (HA) | USA      | A/black vulture/Louisiana/W23-119/2023                  | black vulture              |
| OQ733060 | 4 (HA) | USA      | A/black vulture/Georgia/W22-972A/2022                   | black vulture              |
| OQ733068 | 4 (HA) | USA      | A/bald eagle/South Carolina/W23-142A/2023               | bald eagle                 |
| OQ733076 | 4 (HA) | USA      | A/blue-winged teal/Texas/UGAI22-3226/2022               | blue-winged teal           |
| OQ733092 | 4 (HA) | USA      | A/bald eagle/Virginia/W22-101/2023                      | bald eagle                 |
| OQ733100 | 4 (HA) | USA      | A/blue-winged teal/Texas/UGAI22-3190/2022               | blue-winged teal           |
| OQ733108 | 4 (HA) | USA      | A/blue-winged teal/Texas/UGAI22-2961/2022               | blue-winged teal           |
| OQ733116 | 4 (HA) | USA      | A/black vulture/Georgia/W22-1056A/2022                  | black vulture              |
| OQ733124 | 4 (HA) | USA      | A/blue-winged teal/Minnesota/UGAI22-3611/2022           | blue-winged teal           |
| OQ733140 | 4 (HA) | USA      | A/Canada goose/Virginia/W22-773/2022                    | Canada goose               |
| OQ733148 | 4 (HA) | USA      | A/blue-winged teal/Minnesota/AV22-680/2022              | blue-winged teal           |
| OQ733156 | 4 (HA) | USA      | A/mallard duck/Minnesota/AV22-632/2022                  | mallard duck               |
| OQ734878 | 4 (HA) | USA      | A/red-tailed hawk/Kansas/W22-1226/2022                  | red-tailed hawk            |
| OQ734894 | 4 (HA) | USA      | A/American green-winged teal/Texas/UGAI22-3462/2022     | American green-winged teal |
| OQ734902 | 4 (HA) | USA      | A/Cooper's hawk/Kansas/W22-1206/2022                    | Cooper's hawk              |
| OQ734918 | 4 (HA) | USA      | A/brown pelican/North Carolina/W23-019/2022             | brown pelican              |
| OQ734937 | 4 (HA) | USA      | A/herring gull/North Carolina/W1215B/2022               | herring gull               |
| OQ734964 | 4 (HA) | USA      | A/black vulture/North Carolina/W22-1213/2022            | black vulture              |
| OQ734972 | 4 (HA) | USA      | A/bald eagle/Virginia/W22-1222/2022                     | bald eagle                 |
| OQ737769 | 4 (HA) | USA      | A/great black-backed gull/North Carolina/W22-1215A/2022 | great black-backed gull    |
| OQ747758 | 4 (HA) | Peru     | A/Peruvian_pelican/Peru/A074/2022                       | Peruvian_pelican           |
| OQ747759 | 4 (HA) | Peru     | A/Belcher's_gull/Peru/A102/2022                         | Belcher's_gull             |
| OQ747760 | 4 (HA) | Peru     | A/Peruvian_pelican/Peru/A106/2022                       | Peruvian_pelican           |
| OQ747761 | 4 (HA) | Peru     | A/Belcher's_gull/Peru/A267/2022                         | Belcher's_gull             |
| OQ747762 | 4 (HA) | Peru     | A/American kestrel/Peru/A273/2022                       | American kestrel           |
| OQ789275 | 4 (HA) | USA      | A/American wigeon/South Carolina/AH0195145/2021         | American wigeon            |
| OQ851647 | 4 (HA) | USA      | A/Pekin duck/California/T2202390/2022                   | Pekin duck                 |
| OQ954536 | 4 (HA) | USA      | A/black vulture/Louisiana/W23-166/2023                  | black vulture              |
| OQ982388 | 4 (HA) | USA      | A/mallard duck/Minnesota/UGAI22-3846/2022               | mallard duck               |
| OQ982396 | 4 (HA) | USA      | A/bald eagle/North Carolina/W23-012/2022                | bald eagle                 |
| OQ982404 | 4 (HA) | USA      | A/blue-winged teal/Louisiana/UGAI22-3889/2022           | blue-winged teal           |
| OQ982412 | 4 (HA) | USA      | A/blue-winged teal/Minnesota/UGAI22-3834/2022           | blue-winged teal           |
| OQ982420 | 4 (HA) | USA      | A/blue-winged teal/Louisiana/UGAI22-3875/2022           | blue-winged teal           |
| OP269982 | 5 (NP) | USA      | A/Vulpes vulpes/USA                                     | Vulpes vulpes              |
| OP377529 | 5 (NP) | USA      | A/common eiders/Maine/W22-481B/2022(H5N1)               | Somateria mollissima       |
| OP597634 | 5 (NP) | Russia   | A/pelican/Tumen/932-1/2021(H5N1)                        | pelican                    |
| OQ428780 | 5 (NP) | USA      | A/Anas platyrhynchos/AZ/S1-AZMCP12122022-S5/2022(H5N1)  | Anas platyrhynchos         |
| OQ584578 | 5 (NP) | USA      | A/black vulture/South Carolina/W22-623/2022(H5N1)       | Coragyps atratus           |
| OQ632844 | 5 (NP) | France   | A/Mule-duck/France/21343/2021(H5N1)                     | Mule-duck                  |
| OQ632850 | 5 (NP) | France   | A/Mule-duck/France/21352/2021(H5N1)                     | Mule-duck                  |
| OQ632851 | 5 (NP) | France   | A/Mule-duck/France/21356/2021(H5N1)                     | Mule-duck                  |
| OQ730466 | 5 (NP) | USA      | A/harbor seal/Maine/MME-22-150Pv-ns/2022(H5N1)          | Phoca vitulina             |
| OQ734951 | 5 (NP) | USA      | A/great-tailed grackle/Kansas/W22-1223B/2022(H5N1)      | Quiscalus mexicanus        |
| OQ954547 | 5 (NP) | USA      | A/striped skunk/Kansas/W23-175/2023(H5N1)               | Mephitis mephitis          |
| OR125145 | 5 (NP) | Chile    | A/Blackish oystercatcher/OHiggins/240628/2023(H5N1)     | Haematopus ater            |

|          |        |                |                                                          |                                        |
|----------|--------|----------------|----------------------------------------------------------|----------------------------------------|
| OR125176 | 5 (NP) | Chile          | A/chicken/Nuble/239136/2023(H5N1)                        | Gallus gallus                          |
| OR125352 | 5 (NP) | Chile          | A/Turkey/Araucania/241892-3/2023(H5N1)                   | Meleagris gallopavo                    |
| OR125477 | 5 (NP) | Chile          | A/Humboldt penguin/Tarapaca/238744-2/2023(H5N1)          | Spheniscus humboldti                   |
| OR125496 | 5 (NP) | Chile          | A/Domestic duck/Araucania/239189-3/2023(H5N1)            | Anas platyrhynchos domesticus          |
| OR136565 | 5 (NP) | USA            | A/chicken/OH/OH22-20542-2/2022(H5N1)                     | Chicken; Gallus gallus domesticus      |
| OR136573 | 5 (NP) | USA            | A/chicken/OH/OH22-21172-2/2022(H5N1)                     | Chicken; Gallus gallus domesticus      |
| OR136613 | 5 (NP) | USA            | A/goose/OH/OH22-21298/2022(H5N1)                         | Goose; Anser cygnoides domesticus      |
| OR165065 | 5 (NP) | USA            | A/black vulture/Georgia/W22-406/2022(H5N1)               | Coragyps atratus                       |
| OP221044 | 5 (NP) | USA            | A/bald eagle/Kansas/W22-197/2022                         | bald eagle                             |
| OP221314 | 5 (NP) | USA            | A/bald eagle/Florida/W22-191/2022                        | bald eagle                             |
| OP221346 | 5 (NP) | USA            | A/American pelican/Kansas/W22-200/2022                   | American pelican                       |
| OP221401 | 5 (NP) | USA            | A/bald eagle/Florida/W22-189/2022                        | bald eagle                             |
| OP377325 | 5 (NP) | USA            | A/snow goose/North Dakota/N22-06/2022                    | snow goose                             |
| OP377367 | 5 (NP) | USA            | A/snow goose/North Dakota/N22-05/2022                    | snow goose                             |
| OP377415 | 5 (NP) | USA            | A/royal tern/Florida/W22-245B/2022                       | royal tern                             |
| OP377521 | 5 (NP) | USA            | A/snow goose/Kansas/W22-260/2022                         | snow goose                             |
| OP377561 | 5 (NP) | USA            | A/black vulture/North Carolina/W22-367C/2022             | black vulture                          |
| OP377625 | 5 (NP) | USA            | A/bald eagle/North Carolina/W22-140/2022                 | bald eagle                             |
| OP470784 | 5 (NP) | USA            | A/lesser scaup/Georgia/W22-145E/2022                     | lesser scaup                           |
| OP470792 | 5 (NP) | USA            | A/snow goose/Kentucky/W22-092/2022                       | snow goose                             |
| OP950298 | 5 (NP) | Venezuela      | A/Pelecanus occidentalis/Venezuela/Pel3S5/2022           | Pelecanus occidentalis                 |
| QQ442198 | 5 (NP) | USA            | A/red-shouldered hawk/North Carolina/W22-121/2022        | red-shouldered hawk                    |
| OQ455443 | 5 (NP) | Chile          | A/Gull/CHL/227023-3/2022                                 | Gull                                   |
| OQ547313 | 5 (NP) | Peru           | A/Gallus gallus/Peru/AIS0545/2022                        | Gallus gallus                          |
| OQ584539 | 5 (NP) | USA            | A/black vulture/South Carolina/W22-689B/2022             | black vulture                          |
| OQ584585 | 5 (NP) | USA            | A/black vulture/Virginia/W22-667A/2022                   | black vulture                          |
| OQ584673 | 5 (NP) | USA            | A/black vulture/Georgia/W22-719A/2022                    | black vulture                          |
| OQ632899 | 5 (NP) | France         | A/chicken/France/21328/2021                              | chicken                                |
| OQ683459 | 5 (NP) | Colombia       | A/chicken/Colombia/Bolivar/3500/2022                     | chicken                                |
| OQ683467 | 5 (NP) | Colombia       | A/chicken/Colombia/Choco/3502/2022                       | chicken                                |
| OQ683475 | 5 (NP) | Colombia       | A/chicken/Colombia/Choco/3504/2022                       | chicken                                |
| OQ683491 | 5 (NP) | Colombia       | A/chicken/Colombia/Magdalena/3503/2022                   | chicken                                |
| OQ683499 | 5 (NP) | Colombia       | A/wild duck/Colombia/Choco/3501/2022                     | wild duck                              |
| OQ694849 | 5 (NP) | USA            | A/snow goose/Kansas/W22-1143/2022                        | snow goose                             |
| OQ694865 | 5 (NP) | USA            | A/black vulture/South Carolina/W22-1112/2022             | black vulture                          |
| OQ694873 | 5 (NP) | USA            | A/black vulture/South Carolina/W22-1080B/2022            | black vulture                          |
| OQ694881 | 5 (NP) | USA            | A/snow goose/Louisiana/W22-1163/2022                     | snow goose                             |
| OQ694905 | 5 (NP) | USA            | A/Canada goose/North Carolina/W22-1055/2022              | Canada goose                           |
| OQ694923 | 5 (NP) | USA            | A/mallard/North Carolina/W22-1114A/2022                  | mallard                                |
| OQ694931 | 5 (NP) | USA            | A/snow goose/Louisiana/W22-1146A/2022                    | snow goose                             |
| OQ694955 | 5 (NP) | USA            | A/black vulture/Tennessee/W22-1149/2022                  | black vulture                          |
| OQ696055 | 5 (NP) | USA            | A/Ross's goose/Kansas/W22-1154/2022                      | Ross's goose                           |
| OQ732975 | 5 (NP) | USA            | A/blue-winged teal/Texas/UGAI22-2966/2022                | blue-winged teal                       |
| OQ732983 | 5 (NP) | USA            | A/black vulture/Georgia/W22-933C/2022                    | black vulture                          |
| OQ732999 | 5 (NP) | USA            | A/blue-winged teal/Texas/UGAI22-3268/2022                | blue-winged teal                       |
| OQ733007 | 5 (NP) | USA            | A/blue-winged teal/Minnesota/UGAI22-3620/2022            | blue-winged teal                       |
| OQ733015 | 5 (NP) | USA            | A/blue-winged teal/Texas/UGAI22-3250/2022                | blue-winged teal                       |
| OQ733031 | 5 (NP) | USA            | A/blue-winged teal/Texas/UGAI22-3189/2022                | blue-winged teal                       |
| OQ733063 | 5 (NP) | USA            | A/black vulture/Georgia/W22-972A/2022                    | black vulture                          |
| OQ733071 | 5 (NP) | USA            | A/bald eagle/South Carolina/W23-142A/2023                | bald eagle                             |
| OQ733135 | 5 (NP) | USA            | A/black vulture/Louisiana/W23-118/2023                   | black vulture                          |
| OQ733151 | 5 (NP) | USA            | A/blue-winged teal/Minnesota/AV22-680/2022               | blue-winged teal                       |
| OQ734881 | 5 (NP) | USA            | A/red-tailed hawk/Kansas/W22-1226/2022                   | red-tailed hawk                        |
| OQ734897 | 5 (NP) | USA            | A/American green-winged teal/Texas/UGAI22-3462/2022      | American green-winged teal             |
| OQ734921 | 5 (NP) | USA            | A/brown pelican/North Carolina/W23-019/2022              | brown pelican                          |
| OQ734929 | 5 (NP) | USA            | A/double-crested cormorant/North Carolina/W22-1215C/2022 | double-crested cormorant               |
| OQ734940 | 5 (NP) | USA            | A/herring gull/North Carolina/W1215B/2022                | herring gull                           |
| OQ734975 | 5 (NP) | USA            | A/bald eagle/Virginia/W22-1222/2022                      | bald eagle                             |
| OQ851650 | 5 (NP) | USA            | A/Pekin duck/California/T2202390/2022                    | Pekin duck                             |
| OQ982391 | 5 (NP) | USA            | A/mallard duck/Minnesota/UGAI22-3846/2022                | mallard duck                           |
| OQ982415 | 5 (NP) | USA            | A/blue-winged teal/Minnesota/UGAI22-3834/2022            | blue-winged teal                       |
| OL636394 | 6 (NA) | Czech Republic | A/goose/Czech Republic/18520-1/2021(H5N1)                | goose                                  |
| OP269954 | 6 (NA) | USA            | A/Vulpes vulpes/USA                                      | Vulpes vulpes                          |
| OP377527 | 6 (NA) | USA            | A/common eiders/Maine/W22-481B/2022(H5N1)                | Somateria mollissima                   |
| OP597614 | 6 (NA) | Russia         | A/common teal/Chelyabinsk/1379-1/2021(H5N1)              | common teal                            |
| OP597622 | 6 (NA) | Russia         | A/goose/Chelyabinsk/1341-3/2021(H5N1)                    | goose                                  |
| OP597638 | 6 (NA) | Russia         | A/pelican/Tumen/932-1/2021(H5N1)                         | pelican                                |
| OP691326 | 6 (NA) | Mexico         | A/Falco rusticolus/EdoMex/CPA-19638-22/2022(H5N1)        | Falco rusticolus                       |
| OQ428781 | 6 (NA) | USA            | A/Anas platyrhynchos/AZ/S1-AZMCP12122022-S6/2022(H5N1)   | Anas platyrhynchos                     |
| OQ584498 | 6 (NA) | USA            | A/black vulture/Georgia/W22-723A/2022(H5N1)              | Coragyps atratus                       |
| OQ584576 | 6 (NA) | USA            | A/black vulture/South Carolina/W22-623/2022(H5N1)        | Coragyps atratus                       |
| OQ632853 | 6 (NA) | France         | A/Mule-duck/France/21343/2021(H5N1)                      | Mule-duck                              |
| OQ632854 | 6 (NA) | France         | A/Mule-duck/France/21347/2021(H5N1)                      | Mule-duck                              |
| OQ632855 | 6 (NA) | France         | A/Mule-duck/France/21348/2021(H5N1)                      | Mule-duck                              |
| OQ632856 | 6 (NA) | France         | A/Mule-duck/France/21349/2021(H5N1)                      | Mule-duck                              |
| OQ632857 | 6 (NA) | France         | A/Mule-duck/France/21356/2021(H5N1)                      | Mule-duck                              |
| OQ632861 | 6 (NA) | France         | A/Mule-duck/France/22027/2022(H5N1)                      | Mule-duck                              |
| OQ632862 | 6 (NA) | France         | A/Mule-duck/France/22030/2022(H5N1)                      | Mule-duck                              |
| OQ632864 | 6 (NA) | France         | A/Pekin-duck/France/22077/2022(H5N1)                     | Pekin-duck                             |
| OQ632865 | 6 (NA) | France         | A/Mule-duck/France/22083/2022(H5N1)                      | Mule-duck                              |
| OQ632866 | 6 (NA) | France         | A/Turkey/France/22084/2022(H5N1)                         | turkey                                 |
| OQ632867 | 6 (NA) | France         | A/Mule-duck/France/21350/2021(H5N1)                      | Mule-duck                              |
| OQ733085 | 6 (NA) | USA            | A/striped skunk/Kansas/W23-094/2023(H5N1)                | Mephitis mephitis                      |
| OQ734949 | 6 (NA) | USA            | A/great-tailed grackle/Kansas/W22-1223B/2022(H5N1)       | Quiscalus mexicanus                    |
| OQ734957 | 6 (NA) | USA            | A/great-tailed grackle/Kansas/W22-1223A/2022(H5N1)       | Quiscalus mexicanus                    |
| OQ954545 | 6 (NA) | USA            | A/striped skunk/Kansas/W23-175/2023(H5N1)                | Mephitis mephitis                      |
| OR125149 | 6 (NA) | Chile          | A/Whimbrel/Valparaiso/239946/2023(H5N1)                  | Numenius phaeopus                      |
| OR125157 | 6 (NA) | Chile          | A/South American tern/Maule/238507/2023(H5N1)            | Sterna hirundinacea                    |
| OR125203 | 6 (NA) | Chile          | A/chicken/Nuble/240155/2023(H5N1)                        | Gallus gallus                          |
| OR125363 | 6 (NA) | Chile          | A/Chiloe wigeon/OHiggins/240893-2/2023(H5N1)             | Mareca sibilatrix                      |
| OR136526 | 6 (NA) | USA            | A/Silver Pheasant/OH/OH22-20552/2022(H5N1)               | Silver Pheasant; Lophura nycthemera    |
| OR136542 | 6 (NA) | USA            | A/Turkey/OH/OH22-21172-1/2022(H5N1)                      | Turkey; Meleagris gallopavo domesticus |
| OR136558 | 6 (NA) | USA            | A/chicken/OH/OH22-20542-1/2022(H5N1)                     | Chicken; Gallus gallus domesticus      |
| OR136582 | 6 (NA) | USA            | A/chicken/OH/OH22-26275-1/2022(H5N1)                     | Chicken; Gallus gallus domesticus      |
| OP221042 | 6 (NA) | USA            | A/bald eagle/Kansas/W22-197/2022                         | bald eagle                             |
| OP221336 | 6 (NA) | USA            | A/bald eagle/Georgia/W22-202/2022                        | bald eagle                             |
| OP377339 | 6 (NA) | USA            | A/black vulture/Virginia/W22-499C/2022                   | black vulture                          |
| OP377413 | 6 (NA) | USA            | A/royal tern/Florida/W22-245B/2022                       | royal tern                             |
| OP377503 | 6 (NA) | USA            | A/common tern/Maine/W22-480A/2022                        | common tern                            |
| OP377535 | 6 (NA) | USA            | A/bald eagle/Florida/W22-153A/2022                       | bald eagle                             |
| OP377559 | 6 (NA) | USA            | A/black vulture/North Carolina/W22-367C/2022             | black vulture                          |
| OP950299 | 6 (NA) | Venezuela      | A/Pelecanus occidentalis/Venezuela/Pel3S6/2022           | Pelecanus occidentalis                 |
| OP950307 | 6 (NA) | Venezuela      | A/Pelecanus occidentalis/Venezuela/Pel4S6/2022           | Pelecanus occidentalis                 |
| OQ352558 | 6 (NA) | Chile          | A/gray gull/Chile/C61947/2022                            | gray gull                              |
| OQ584537 | 6 (NA) | USA            | A/black vulture/South Carolina/W22-689B/2022             | black vulture                          |
| OQ584545 | 6 (NA) | USA            | A/black vulture/Georgia/W22-675B/2022                    | black vulture                          |
| OQ632900 | 6 (NA) | France         | A/chicken/France/21328/2021                              | chicken                                |
| OQ683468 | 6 (NA) | Colombia       | A/chicken/Colombia/Choco/3502/2022                       | chicken                                |



|          |        |           |                                                             |                                        |
|----------|--------|-----------|-------------------------------------------------------------|----------------------------------------|
| OQ683476 | 6 (NA) | Colombia  | A/chicken/Colombia/Choco/3504/2022                          | chicken                                |
| OQ683500 | 6 (NA) | Colombia  | A/wild duck/Colombia/Choco/3501/2022                        | wild duck                              |
| OQ694847 | 6 (NA) | USA       | A/snow goose/Kansas/W22-1143/2022                           | snow goose                             |
| OQ694863 | 6 (NA) | USA       | A/black vulture/South Carolina/W22-1112/2022                | black vulture                          |
| OQ694879 | 6 (NA) | USA       | A/snow goose/Louisiana/W22-1163/2022                        | snow goose                             |
| OQ694903 | 6 (NA) | USA       | A/Canada goose/North Carolina/W22-1055/2022                 | Canada goose                           |
| OQ694921 | 6 (NA) | USA       | A/mallard/North Carolina/W22-1114A/2022                     | mallard                                |
| OQ694929 | 6 (NA) | USA       | A/snow goose/Louisiana/W22-1146A/2022                       | snow goose                             |
| OQ694945 | 6 (NA) | USA       | A/black vulture/Tennessee/W22-1150B/2022                    | black vulture                          |
| OQ732957 | 6 (NA) | USA       | A/blue-winged teal/Minnesota/AV22-690/2022                  | blue-winged teal                       |
| OQ732973 | 6 (NA) | USA       | A/blue-winged teal/Texas/UGAI22-2966/2022                   | blue-winged teal                       |
| OQ732981 | 6 (NA) | USA       | A/black vulture/Georgia/W22-933C/2022                       | black vulture                          |
| OQ732997 | 6 (NA) | USA       | A/blue-winged teal/Texas/UGAI22-3268/2022                   | blue-winged teal                       |
| OQ733005 | 6 (NA) | USA       | A/blue-winged teal/Minnesota/UGAI22-3620/2022               | blue-winged teal                       |
| OQ733013 | 6 (NA) | USA       | A/blue-winged teal/Texas/UGAI22-3250/2022                   | blue-winged teal                       |
| OQ733053 | 6 (NA) | USA       | A/black vulture/Louisiana/W23-119/2023                      | black vulture                          |
| OQ733069 | 6 (NA) | USA       | A/bald eagle/South Carolina/W23-142A/2023                   | bald eagle                             |
| OQ733125 | 6 (NA) | USA       | A/blue-winged teal/Minnesota/UGAI22-3611/2022               | blue-winged teal                       |
| OQ733149 | 6 (NA) | USA       | A/blue-winged teal/Minnesota/AV22-680/2022                  | blue-winged teal                       |
| OQ734895 | 6 (NA) | USA       | A/American green-winged teal/Texas/UGAI22-3462/2022         | American green-winged teal             |
| OQ734919 | 6 (NA) | USA       | A/brown pelican/North Carolina/W23-019/2022                 | brown pelican                          |
| OQ734927 | 6 (NA) | USA       | A/double-crested cormorant/North Carolina/W22-1215C/2022    | double-crested cormorant               |
| OQ734938 | 6 (NA) | USA       | A/herring gull/North Carolina/W1215B/2022                   | herring gull                           |
| OQ734965 | 6 (NA) | USA       | A/black vulture/North Carolina/W22-1213/2022                | black vulture                          |
| OQ734973 | 6 (NA) | USA       | A/bald eagle/Virginia/W22-1222/2022                         | bald eagle                             |
| OQ737770 | 6 (NA) | USA       | A/great black-backed gull/North Carolina/W22-1215A/2022     | great black-backed gull                |
| OQ982405 | 6 (NA) | USA       | A/blue-winged teal/Louisiana/UGAI22-3889/2022               | blue-winged teal                       |
| ON759333 | 7 (MP) | USA       | A/Colorado/18/2022(H5N1)                                    | Homo sapiens                           |
| OP269958 | 7 (MP) | USA       | A/Vulpes vulpes/USA                                         | Vulpes vulpes                          |
| OP270009 | 7 (MP) | USA       | A/Vulpes vulpes/USA                                         | Vulpes vulpes                          |
| OP377463 | 7 (MP) | USA       | A/bald eagle/Florida/W22-153B/2022(H5N1)                    | Haliaeetus leucocephalus               |
| OP377528 | 7 (MP) | USA       | A/common eiders/Maine/W22-481B/2022(H5N1)                   | Somateria mollissima                   |
| OP597613 | 7 (MP) | Russia    | A/common teal/Chelyabinsk/1379-1/2021(H5N1)                 | common teal                            |
| OP597629 | 7 (MP) | Russia    | A/pelican/Tumen/1032-1/2021(H5N1)                           | pelican                                |
| OP597637 | 7 (MP) | Russia    | A/pelican/Tumen/932-1/2021(H5N1)                            | pelican                                |
| OP691327 | 7 (MP) | Mexico    | A/Falco_rusticolus/EdoMex/CPA-19638-22/2022(H5N1)           | Falco_rusticolus                       |
| OP698131 | 7 (MP) | USA       | A/bottlenose dolphin/Florida/UFT12203/2022(H5N1)            | Tursiops truncatus                     |
| OQ428782 | 7 (MP) | USA       | A/Anas platyrhynchos/AZ/S1-AZMCP12122022-S7/2022(H5N1)      | Anas platyrhynchos                     |
| OQ584562 | 7 (MP) | USA       | A/bald eagle/North Carolina/W22-729/2022(H5N1)              | Haliaeetus leucocephalus               |
| OQ584577 | 7 (MP) | USA       | A/black vulture/South Carolina/W22-623/2022(H5N1)           | Coragyps atratus                       |
| OQ595419 | 7 (MP) | USA       | A/black vulture/Georgia/W22-723A/2022(H5N1)                 | Coragyps atratus                       |
| OQ632868 | 7 (MP) | France    | A/Mule-duck/France/21343/2021(H5N1)                         | Mule-duck                              |
| OQ632869 | 7 (MP) | France    | A/Mule-duck/France/21347/2021(H5N1)                         | Mule-duck                              |
| OQ632874 | 7 (MP) | France    | A/Mule-duck/France/21352/2021(H5N1)                         | Mule-duck                              |
| OQ730458 | 7 (MP) | USA       | A/harbor seal/Maine/MME-22-147Pv-L/2022(H5N1)               | Phoca vitulina                         |
| OQ730497 | 7 (MP) | USA       | A/harbor seal/Maine/MME-22-185Pv-ns/2022(H5N1)              | Phoca vitulina                         |
| OQ733086 | 7 (MP) | USA       | A/striped skunk/Kansas/W23-094/2023(H5N1)                   | Mephitis mephitis                      |
| OQ734912 | 7 (MP) | USA       | A/great-tailed grackle/Kansas/W22-1223C/2022(H5N1)          | Quiscalus mexicanus                    |
| OQ734950 | 7 (MP) | USA       | A/great-tailed grackle/Kansas/W22-1223B/2022(H5N1)          | Quiscalus mexicanus                    |
| OQ734958 | 7 (MP) | USA       | A/great-tailed grackle/Kansas/W22-1223A/2022(H5N1)          | Quiscalus mexicanus                    |
| OQ843968 | 7 (MP) | USA       | A/environment/Wright County/Wright-A/2022(H5N1)             | NA                                     |
| OQ954546 | 7 (MP) | USA       | A/striped skunk/Kansas/W23-175/2023(H5N1)                   | Mephitis mephitis                      |
| OR125150 | 7 (MP) | Chile     | A/Whimbrel/Valparaiso/239946/2023(H5N1)                     | Numenius phaeopus                      |
| OR125158 | 7 (MP) | Chile     | A/South American tern/Maule/238507/2023(H5N1)               | Sterna hirundinacea                    |
| OR125170 | 7 (MP) | Chile     | A/Humboldt penguin/Coquimbo/239590/2023(H5N1)               | Spheniscus humboldti                   |
| OR125191 | 7 (MP) | Chile     | A/Sanderling/Arica y Parinacota/240265/2023(H5N1)           | Calidris alba                          |
| OR125196 | 7 (MP) | Chile     | A/Black-crowned night-heron/Antofagasta/228705-2/2022(H5N1) | Nycticorax nycticorax                  |
| OR125211 | 7 (MP) | Chile     | A/Black Skimmer/Maule/240379/2023(H5N1)                     | Rynchops niger                         |
| OR125235 | 7 (MP) | Chile     | A/Pelican/Antofagasta/228246-2/2022(H5N1)                   | Pelecanus sp.                          |
| OR125315 | 7 (MP) | Chile     | A/Pelican/Atacama/229424-2/2022(H5N1)                       | Pelecanus sp.                          |
| OR125330 | 7 (MP) | Chile     | A/chicken/OHiggins/241252-1/2023(H5N1)                      | Gallus gallus                          |
| OR125336 | 7 (MP) | Chile     | A/goose/Araucania/239189-1/2023(H5N1)                       | Anser sp.                              |
| OR125353 | 7 (MP) | Chile     | A/Turkey/Araucania/241892-3/2023(H5N1)                      | Meleagris gallopavo                    |
| OR125364 | 7 (MP) | Chile     | A/Chiloe wigeon/OHiggins/240893-2/2023(H5N1)                | Mareca sibilatrix                      |
| OR125386 | 7 (MP) | Chile     | A/chicken/Nuble/241681-1/2023(H5N1)                         | Gallus gallus                          |
| OR125417 | 7 (MP) | Chile     | A/chicken/Nuble/241557-1/2023(H5N1)                         | Gallus gallus                          |
| OR125448 | 7 (MP) | Chile     | A/chicken/Araucania/241892-2/2023(H5N1)                     | Gallus gallus                          |
| OR125491 | 7 (MP) | Chile     | A/chicken/Araucania/240481-1/2023(H5N1)                     | Gallus gallus                          |
| OR136519 | 7 (MP) | USA       | A/Bald Eagle/OH/OH22-8477/2023(H5N1)                        | Bald Eagle; Haliaeetus leucocephalus   |
| OR136527 | 7 (MP) | USA       | A/Silver Pheasant/OH/OH22-20552/2022(H5N1)                  | Silver Pheasant; Lophura nycthemera    |
| OR136535 | 7 (MP) | USA       | A/Swan/OH/OH22-22368-2/2022(H5N1)                           | Swan; Cygnus sp.                       |
| OR136543 | 7 (MP) | USA       | A/Turkey/OH/OH22-21172-1/2022(H5N1)                         | Turkey; Meleagris gallopavo domesticus |
| OR136559 | 7 (MP) | USA       | A/chicken/OH/OH22-20542-1/2022(H5N1)                        | Chicken; Gallus gallus domesticus      |
| OR136567 | 7 (MP) | USA       | A/chicken/OH/OH22-20542-2/2022(H5N1)                        | Chicken; Gallus gallus domesticus      |
| OR136607 | 7 (MP) | USA       | A/chicken/OH/OH22-7075/2022(H5N1)                           | Chicken; Gallus gallus domesticus      |
| OR136610 | 7 (MP) | USA       | A/goose/OH/OH22-21298/2022(H5N1)                            | Goose; Anser cygnoides domesticus      |
| OR165048 | 7 (MP) | USA       | A/common eider/Massachusetts/W22-438A/2022(H5N1)            | Somateria mollissima                   |
| OR165064 | 7 (MP) | USA       | A/black vulture/Georgia/W22-406/2022(H5N1)                  | Coragyps atratus                       |
| OR165072 | 7 (MP) | USA       | A/black vulture/Georgia/W22-487/2022(H5N1)                  | Coragyps atratus                       |
| OP221043 | 7 (MP) | USA       | A/bald eagle/Kansas/W22-197/2022                            | bald eagle                             |
| OP221287 | 7 (MP) | USA       | A/snow goose/Kansas/W22-199D/2022                           | snow goose                             |
| OP221303 | 7 (MP) | USA       | A/bald eagle/Georgia/W22-194B/2022                          | bald eagle                             |
| OP221352 | 7 (MP) | USA       | A/snow goose/Kansas/W22-199A/2022                           | snow goose                             |
| OP221368 | 7 (MP) | USA       | A/bald eagle/South Carolina/W22-205/2022                    | bald eagle                             |
| OP221376 | 7 (MP) | USA       | A/snow goose/Kansas/W22-199E/2022                           | snow goose                             |
| OP377324 | 7 (MP) | USA       | A/snow goose/North Dakota/N22-06/2022                       | snow goose                             |
| OP377332 | 7 (MP) | USA       | A/snow goose/North Dakota/N22-04/2022                       | snow goose                             |
| OP377340 | 7 (MP) | USA       | A/black vulture/Virginia/W22-499C/2022                      | black vulture                          |
| OP377398 | 7 (MP) | USA       | A/muscovy duck/Florida/W22-306/2022                         | muscovy duck                           |
| OP377422 | 7 (MP) | USA       | A/gull/Florida/W22-162/2022                                 | gull                                   |
| OP377447 | 7 (MP) | USA       | A/bald eagle/North Carolina/W22-229/2022                    | bald eagle                             |
| OP377504 | 7 (MP) | USA       | A/common tern/Maine/W22-480A/2022                           | common tern                            |
| OP377552 | 7 (MP) | USA       | A/common tern/Maine/W22-480B/2022                           | common tern                            |
| OP377584 | 7 (MP) | USA       | A/lesser snow goose/North Dakota/ND-10/2022                 | lesser snow goose                      |
| OP377592 | 7 (MP) | USA       | A/snow goose/Kansas/W22-174B/2022                           | snow goose                             |
| OP377608 | 7 (MP) | USA       | A/brown pelican/North Carolina/W22-164/2022                 | brown pelican                          |
| OP377624 | 7 (MP) | USA       | A/bald eagle/North Carolina/W22-140/2022                    | bald eagle                             |
| OP377640 | 7 (MP) | USA       | A/great horned owl/Florida/W22-163C/2022                    | great horned owl                       |
| OP470718 | 7 (MP) | USA       | A/lesser scaup/Georgia/W22-145C/2022                        | lesser scaup                           |
| OP470751 | 7 (MP) | USA       | A/lesser scaup/Georgia/W22-145B/2022                        | lesser scaup                           |
| OP470767 | 7 (MP) | USA       | A/lesser scaup/Georgia/W22-143/2022                         | lesser scaup                           |
| OP470783 | 7 (MP) | USA       | A/lesser scaup/Georgia/W22-145E/2022                        | lesser scaup                           |
| OP470791 | 7 (MP) | USA       | A/snow goose/Kentucky/W22-092/2022                          | snow goose                             |
| OP470814 | 7 (MP) | USA       | A/lesser scaup/Florida/W22-129A/2022                        | lesser scaup                           |
| OP950300 | 7 (MP) | Venezuela | A/Pelecanus occidentalis/Venezuela/Pel3S7/2022              | Pelecanus occidentalis                 |
| OP950308 | 7 (MP) | Venezuela | A/Pelecanus occidentalis/Venezuela/Pel4S7/2022              | Pelecanus occidentalis                 |
| OQ352543 | 7 (MP) | Chile     | A/Peruvian pelican/Chile/C61740/2022                        | Peruvian pelican                       |
| OQ352551 | 7 (MP) | Chile     | A/black skimmer/Chile/C61962/2022                           | black skimmer                          |



|          |        |          |                                                          |                            |
|----------|--------|----------|----------------------------------------------------------|----------------------------|
| OQ455408 | 7 (MP) | Chile    | A/Pelican/CHL/227023-1/2022                              | Pelican                    |
| OQ455412 | 7 (MP) | Chile    | A/Pelican/CHL/226618-2/2022                              | Pelican                    |
| OQ455427 | 7 (MP) | Chile    | A/Pelican/CHL/226924-1/2022                              | Pelican                    |
| OQ455433 | 7 (MP) | Chile    | A/Pelican/CHL/226618-1/2022                              | Pelican                    |
| OQ455461 | 7 (MP) | Chile    | A/Pelican/CHL/227087-1/2022                              | Pelican                    |
| OQ547330 | 7 (MP) | Peru     | A/Nannopterum brasilianus/Peru/AISA0451/2022             | Nannopterum brasilianus    |
| OQ547338 | 7 (MP) | Peru     | A/Pelecanus thagus/Peru/AIS0541/2022                     | Pelecanus thagus           |
| OQ547346 | 7 (MP) | Peru     | A/Gallus gallus/Peru/AIS0539/2022                        | Gallus gallus              |
| OQ547362 | 7 (MP) | Peru     | A/Gallus gallus/Peru/AIS0542/2022                        | Gallus gallus              |
| OQ547394 | 7 (MP) | Peru     | A/Gallus gallus/Peru/AIS0548/2022                        | Gallus gallus              |
| OQ547410 | 7 (MP) | Peru     | A/Gallus gallus/Peru/AIS0550/2022                        | Gallus gallus              |
| OQ547442 | 7 (MP) | Peru     | A/Pelecanus thagus/Peru/AIS0538/2022                     | Pelecanus thagus           |
| OQ547450 | 7 (MP) | Peru     | A/Pelecanus thagus/Peru/AISA0464/2022                    | Pelecanus thagus           |
| OQ565631 | 7 (MP) | Peru     | A/Pelecanus/Peru/VFAR-140/2022                           | Pelecanus                  |
| OQ584522 | 7 (MP) | USA      | A/black vulture/Georgia/W22-404A/2022                    | black vulture              |
| OQ584538 | 7 (MP) | USA      | A/black vulture/South Carolina/W22-689B/2022             | black vulture              |
| OQ584584 | 7 (MP) | USA      | A/black vulture/Virginia/W22-667A/2022                   | black vulture              |
| OQ584680 | 7 (MP) | USA      | A/black vulture/Georgia/W22-749B/2022                    | black vulture              |
| OQ584727 | 7 (MP) | USA      | A/black vulture/Georgia/W22-404B/2022                    | black vulture              |
| OQ584793 | 7 (MP) | USA      | A/black vulture/Georgia/W22-719C/2022                    | black vulture              |
| OQ632901 | 7 (MP) | France   | A/chicken/France/21328/2021                              | chicken                    |
| OQ683461 | 7 (MP) | Colombia | A/chicken/Colombia/Bolivar/3500/2022                     | chicken                    |
| OQ683469 | 7 (MP) | Colombia | A/chicken/Colombia/Choco/3502/2022                       | chicken                    |
| OQ683477 | 7 (MP) | Colombia | A/chicken/Colombia/Choco/3504/2022                       | chicken                    |
| OQ683485 | 7 (MP) | Colombia | A/chicken/Colombia/Cordoba/3499/2022                     | chicken                    |
| OQ683493 | 7 (MP) | Colombia | A/chicken/Colombia/Magdalena/3503/2022                   | chicken                    |
| OQ683501 | 7 (MP) | Colombia | A/wild duck/Colombia/Choco/3501/2022                     | wild duck                  |
| OQ694848 | 7 (MP) | USA      | A/snow goose/Kansas/W22-1143/2022                        | snow goose                 |
| OQ694856 | 7 (MP) | USA      | A/black vulture/North Carolina/W22-1078/2022             | black vulture              |
| OQ694864 | 7 (MP) | USA      | A/black vulture/South Carolina/W22-1112/2022             | black vulture              |
| OQ694872 | 7 (MP) | USA      | A/black vulture/South Carolina/W22-1080B/2022            | black vulture              |
| OQ694880 | 7 (MP) | USA      | A/snow goose/Louisiana/W22-1163/2022                     | snow goose                 |
| OQ694888 | 7 (MP) | USA      | A/black vulture/Georgia/W22-1049/2022                    | black vulture              |
| OQ694904 | 7 (MP) | USA      | A/Canada goose/North Carolina/W22-1055/2022              | Canada goose               |
| OQ694922 | 7 (MP) | USA      | A/mallard/North Carolina/W22-1114A/2022                  | mallard                    |
| OQ694930 | 7 (MP) | USA      | A/snow goose/Louisiana/W22-1146A/2022                    | snow goose                 |
| OQ694938 | 7 (MP) | USA      | A/black vulture/North Carolina/W22-1051A/2022            | black vulture              |
| OQ694954 | 7 (MP) | USA      | A/black vulture/Tennessee/W22-1149/2022                  | black vulture              |
| OQ696054 | 7 (MP) | USA      | A/Ross's goose/Kansas/W22-1154/2022                      | Ross's goose               |
| OQ732942 | 7 (MP) | USA      | A/black vulture/Georgia/W22-969B/2022                    | black vulture              |
| OQ732958 | 7 (MP) | USA      | A/blue-winged teal/Minnesota/AV22-690/2022               | blue-winged teal           |
| OQ732966 | 7 (MP) | USA      | A/red-tailed hawk/Kentucky/W23-143/2022                  | red-tailed hawk            |
| OQ732974 | 7 (MP) | USA      | A/blue-winged teal/Texas/UGAI22-2966/2022                | blue-winged teal           |
| OQ732982 | 7 (MP) | USA      | A/black vulture/Georgia/W22-933C/2022                    | black vulture              |
| OQ732998 | 7 (MP) | USA      | A/blue-winged teal/Texas/UGAI22-3268/2022                | blue-winged teal           |
| OQ733006 | 7 (MP) | USA      | A/blue-winged teal/Minnesota/UGAI22-3620/2022            | blue-winged teal           |
| OQ733014 | 7 (MP) | USA      | A/blue-winged teal/Texas/UGAI22-3250/2022                | blue-winged teal           |
| OQ733022 | 7 (MP) | USA      | A/bald eagle/North Carolina/W23-142A/2023                | bald eagle                 |
| OQ733030 | 7 (MP) | USA      | A/blue-winged teal/Texas/UGAI22-3189/2022                | blue-winged teal           |
| OQ733062 | 7 (MP) | USA      | A/black vulture/Georgia/W22-972A/2022                    | black vulture              |
| OQ733070 | 7 (MP) | USA      | A/bald eagle/South Carolina/W23-142A/2023                | bald eagle                 |
| OQ733078 | 7 (MP) | USA      | A/blue-winged teal/Texas/UGAI22-3226/2022                | blue-winged teal           |
| OQ733094 | 7 (MP) | USA      | A/bald eagle/Virginia/W22-101/2023                       | bald eagle                 |
| OQ733110 | 7 (MP) | USA      | A/blue-winged teal/Texas/UGAI22-2961/2022                | blue-winged teal           |
| OQ733118 | 7 (MP) | USA      | A/black vulture/Georgia/W22-1056A/2022                   | black vulture              |
| OQ733126 | 7 (MP) | USA      | A/blue-winged teal/Minnesota/UGAI22-3611/2022            | blue-winged teal           |
| OQ733134 | 7 (MP) | USA      | A/black vulture/Louisiana/W23-118/2023                   | black vulture              |
| OQ733150 | 7 (MP) | USA      | A/blue-winged teal/Minnesota/AV22-680/2022               | blue-winged teal           |
| OQ734880 | 7 (MP) | USA      | A/red-tailed hawk/Kansas/W22-1226/2022                   | red-tailed hawk            |
| OQ734896 | 7 (MP) | USA      | A/American green-winged teal/Texas/UGAI22-3462/2022      | American green-winged teal |
| OQ734904 | 7 (MP) | USA      | A/Cooper's hawk/Kansas/W22-1206/2022                     | Cooper's hawk              |
| OQ734920 | 7 (MP) | USA      | A/brown pelican/North Carolina/W23-019/2022              | brown pelican              |
| OQ734928 | 7 (MP) | USA      | A/double-crested cormorant/North Carolina/W22-1215C/2022 | double-crested cormorant   |
| OQ734939 | 7 (MP) | USA      | A/herring gull/North Carolina/W1215B/2022                | herring gull               |
| OQ734966 | 7 (MP) | USA      | A/black vulture/North Carolina/W22-1213/2022             | black vulture              |
| OQ734974 | 7 (MP) | USA      | A/bald eagle/Virginia/W22-1222/2022                      | bald eagle                 |
| OQ747896 | 7 (MP) | Peru     | A/Belcher's_gull/Peru/A102/2022                          | Belcher's_gull             |
| OQ747898 | 7 (MP) | Peru     | A/Belcher's_gull/Peru/A267/2022                          | Belcher's_gull             |
| OQ789278 | 7 (MP) | USA      | A/American wigeon/South Carolina/AH0195145/2021          | American wigeon            |
| OQ851648 | 7 (MP) | USA      | A/Pekin duck/California/T2202390/2022                    | Pekin duck                 |
| OQ982390 | 7 (MP) | USA      | A/mallard duck/Minnesota/UGAI22-3846/2022                | mallard duck               |
| OQ982398 | 7 (MP) | USA      | A/bald eagle/North Carolina/W23-012/2022                 | bald eagle                 |
| OQ982406 | 7 (MP) | USA      | A/blue-winged teal/Louisiana/UGAI22-3889/2022            | blue-winged teal           |
| OQ982414 | 7 (MP) | USA      | A/blue-winged teal/Minnesota/UGAI22-3834/2022            | blue-winged teal           |
| OQ982422 | 7 (MP) | USA      | A/blue-winged teal/Louisiana/UGAI22-3875/2022            | blue-winged teal           |
| OP377465 | 8 (NS) | USA      | A/bald eagle/Florida/W22-153B/2022(H5N1)                 | Haliaeetus leucocephalus   |
| OP470801 | 8 (NS) | USA      | A/bald eagle/Florida/W22-142/2022(H5N1)                  | Haliaeetus leucocephalus   |
| OP499864 | 8 (NS) | USA      | A/Lesser scaup/MD/-LC-EESC-024/2022(H5N1)                | Aythya affinis             |
| OQ428783 | 8 (NS) | USA      | A/Anas platyrhynchos/AZ/S1-AZMCP12122022-S8/2022(H5N1)   | Anas platyrhynchos         |
| OQ584500 | 8 (NS) | USA      | A/black vulture/Georgia/W22-723A/2022(H5N1)              | Coragyps atratus           |
| OQ584564 | 8 (NS) | USA      | A/bald eagle/North Carolina/W22-729/2022(H5N1)           | Haliaeetus leucocephalus   |
| OQ584579 | 8 (NS) | USA      | A/black vulture/South Carolina/W22-623/2022(H5N1)        | Coragyps atratus           |
| OQ584697 | 8 (NS) | USA      | A/black vulture/Georgia/W22-619B/2022(H5N1)              | Coragyps atratus           |
| OP221045 | 8 (NS) | USA      | A/bald eagle/Kansas/W22-197/2022                         | bald eagle                 |
| OP221289 | 8 (NS) | USA      | A/snow goose/Kansas/W22-199D/2022                        | snow goose                 |
| OP221297 | 8 (NS) | USA      | A/snow goose/Kansas/W22-199F/2022                        | snow goose                 |
| OP221305 | 8 (NS) | USA      | A/bald eagle/Georgia/W22-194B/2022                       | bald eagle                 |
| OP221315 | 8 (NS) | USA      | A/bald eagle/Florida/W22-191/2022                        | bald eagle                 |
| OP221331 | 8 (NS) | USA      | A/bald eagle/Florida/W22-195/2022                        | bald eagle                 |
| OP221339 | 8 (NS) | USA      | A/bald eagle/Georgia/W22-202/2022                        | bald eagle                 |
| OP221347 | 8 (NS) | USA      | A/American pelican/Kansas/W22-200/2022                   | American pelican           |
| OP221354 | 8 (NS) | USA      | A/snow goose/Kansas/W22-199A/2022                        | snow goose                 |
| OP221362 | 8 (NS) | USA      | A/snow goose/Kansas/W22-199B/2022                        | snow goose                 |
| OP221370 | 8 (NS) | USA      | A/bald eagle/South Carolina/W22-205/2022                 | bald eagle                 |
| OP221378 | 8 (NS) | USA      | A/snow goose/Kansas/W22-199E/2022                        | snow goose                 |
| OP221386 | 8 (NS) | USA      | A/bald eagle/Georgia/W22-194A/2022                       | bald eagle                 |
| OP221394 | 8 (NS) | USA      | A/snow goose/Kansas/W22-199C/2022                        | snow goose                 |
| OP221402 | 8 (NS) | USA      | A/bald eagle/Florida/W22-189/2022                        | bald eagle                 |
| OP377326 | 8 (NS) | USA      | A/snow goose/North Dakota/N22-06/2022                    | snow goose                 |
| OP377334 | 8 (NS) | USA      | A/snow goose/North Dakota/N22-04/2022                    | snow goose                 |
| OP377342 | 8 (NS) | USA      | A/black vulture/Virginia/W22-499C/2022                   | black vulture              |
| OP377368 | 8 (NS) | USA      | A/snow goose/North Dakota/N22-05/2022                    | snow goose                 |
| OP377376 | 8 (NS) | USA      | A/ring-billed gull/Florida/W22-169/2022                  | ring-billed gull           |
| OP377384 | 8 (NS) | USA      | A/bald eagle/Virginia/W22-306/2022                       | bald eagle                 |
| OP377392 | 8 (NS) | USA      | A/black vulture/Virginia/W22-499A/2022                   | black vulture              |
| OP377400 | 8 (NS) | USA      | A/muscovy duck/Florida/W22-306/2022                      | muscovy duck               |
| OP377408 | 8 (NS) | USA      | A/bald eagle/North Carolina/W22-186/2022                 | bald eagle                 |
| OP377416 | 8 (NS) | USA      | A/royal tern/Florida/W22-245B/2022                       | royal tern                 |

|          |        |           |                                                   |                        |
|----------|--------|-----------|---------------------------------------------------|------------------------|
| OP377424 | 8 (NS) | USA       | A/gull/Florida/W22-162/2022                       | gull                   |
| OP377432 | 8 (NS) | USA       | A/snow goose/Kansas/W22-177B/2022                 | snow goose             |
| OP377440 | 8 (NS) | USA       | A/bald eagle/Florida/W22-134-OP/2022              | bald eagle             |
| OP377449 | 8 (NS) | USA       | A/bald eagle/North Carolina/W22-229/2022          | bald eagle             |
| OP377457 | 8 (NS) | USA       | A/black vulture/Florida/W22-168/2022              | black vulture          |
| OP377490 | 8 (NS) | USA       | A/black vulture/Florida/W22-161/2022              | black vulture          |
| OP377498 | 8 (NS) | USA       | A/black vulture/Virginia/W22-499B/2022            | black vulture          |
| OP377506 | 8 (NS) | USA       | A/common tern/Maine/W22-480A/2022                 | common tern            |
| OP377514 | 8 (NS) | USA       | A/great horned owl/Flordia/W22-163A/2022          | great horned owl       |
| OP377522 | 8 (NS) | USA       | A/snow goose/Kansas/W22-260/2022                  | snow goose             |
| OP377538 | 8 (NS) | USA       | A/bald eagle/Florida/W22-153A/2022                | bald eagle             |
| OP377546 | 8 (NS) | USA       | A/great blue heron/Florida/W22-160/2022           | great blue heron       |
| OP377554 | 8 (NS) | USA       | A/common tern/Maine/W22-480B/2022                 | common tern            |
| OP377562 | 8 (NS) | USA       | A/black vulture/North Carolina/W22-367C/2022      | black vulture          |
| OP377570 | 8 (NS) | USA       | A/Ross's goose/North Dakota/N22-08/2022           | Ross's goose           |
| OP377578 | 8 (NS) | USA       | A/black vulture/Florida/W22-167/2022              | black vulture          |
| OP377586 | 8 (NS) | USA       | A/lesser snow goose/North Dakota/ND-10/2022       | lesser snow goose      |
| OP377594 | 8 (NS) | USA       | A/snow goose/Kansas/W22-174B/2022                 | snow goose             |
| OP377610 | 8 (NS) | USA       | A/brown pelican/North Carolina/W22-164/2022       | brown pelican          |
| OP377618 | 8 (NS) | USA       | A/royal tern/Florida/W22-245A/2022                | royal tern             |
| OP377626 | 8 (NS) | USA       | A/bald eagle/North Carolina/W22-140/2022          | bald eagle             |
| OP377634 | 8 (NS) | USA       | A/hooded merganser/Florida/W22-154/2022           | hooded merganser       |
| OP377642 | 8 (NS) | USA       | A/great horned owl/Flordia/W22-163C/2022          | great horned owl       |
| OP377650 | 8 (NS) | USA       | A/bald eagle/Kansas/W22-185/2022                  | bald eagle             |
| OP470720 | 8 (NS) | USA       | A/lesser scaup/Georgia/W22-145C/2022              | lesser scaup           |
| OP470728 | 8 (NS) | USA       | A/bald eagle/FL/W22-114/2022                      | bald eagle             |
| OP470737 | 8 (NS) | USA       | A/bald eagle/Florida/W22-134-CL/2022              | bald eagle             |
| OP470745 | 8 (NS) | USA       | A/bald eagle/FL/W22-114/2022                      | bald eagle             |
| OP470753 | 8 (NS) | USA       | A/lesser scaup/Georgia/W22-145B/2022              | lesser scaup           |
| OP470761 | 8 (NS) | USA       | A/lesser scaup/Georgia/W22-145D/2022              | lesser scaup           |
| OP470769 | 8 (NS) | USA       | A/lesser scaup/Georgia/W22-143/2022               | lesser scaup           |
| OP470777 | 8 (NS) | USA       | A/lesser scaup/Georgia/W22-145A/2022              | lesser scaup           |
| OP470785 | 8 (NS) | USA       | A/lesser scaup/Georgia/W22-145E/2022              | lesser scaup           |
| OP470793 | 8 (NS) | USA       | A/snow goose/Kentucky/W22-092/2022                | snow goose             |
| OP470808 | 8 (NS) | USA       | A/bald eagle/FL/W22-114/2022                      | bald eagle             |
| OP470816 | 8 (NS) | USA       | A/lesser scaup/Florida/W22-129A/2022              | lesser scaup           |
| OP499870 | 8 (NS) | USA       | A/red-tailed hawk/Kansas/W22-198/2022             | red-tailed hawk        |
| OP950301 | 8 (NS) | Venezuela | A/Pelecanus occidentalis/Venezuela/Pel3S8/2022    | Pelecanus occidentalis |
| OP950309 | 8 (NS) | Venezuela | A/Pelecanus occidentalis/Venezuela/Pel4S8/2022    | Pelecanus occidentalis |
| OQ352538 | 8 (NS) | Chile     | A/gray gull/Chile/C61947/2022                     | gray gull              |
| OQ352544 | 8 (NS) | Chile     | A/Peruvian pelican/Chile/C61740/2022              | Peruvian pelican       |
| OQ352552 | 8 (NS) | Chile     | A/black skimmer/Chile/C61962/2022                 | black skimmer          |
| OQ442199 | 8 (NS) | USA       | A/red-shouldered hawk/North Carolina/W22-121/2022 | red-shouldered hawk    |
| OQ455400 | 8 (NS) | Chile     | A/Pelican/CHL/226955-1/2022                       | Pelican                |
| OQ455404 | 8 (NS) | Chile     | A/Gull/CHL/227023-3/2022                          | Gull                   |
| OQ455409 | 8 (NS) | Chile     | A/Pelican/CHL/227023-1/2022                       | Pelican                |
| OQ455413 | 8 (NS) | Chile     | A/Pelican/CHL/226618-2/2022                       | Pelican                |
| OQ455419 | 8 (NS) | Chile     | A/Pelican/CHL/226618-1/2022                       | Pelican                |
| OQ455425 | 8 (NS) | Chile     | A/Pelican/CHL/226958-1/2022                       | Pelican                |
| OQ455428 | 8 (NS) | Chile     | A/Pelican/CHL/226924-1/2022                       | Pelican                |
| OQ455431 | 8 (NS) | Chile     | A/Gull/CHL/227023-2/2022                          | Gull                   |
| OQ455454 | 8 (NS) | Chile     | A/Pelican/CHL/226955-3/2022                       | Pelican                |
| OQ455462 | 8 (NS) | Chile     | A/Pelican/CHL/227087-1/2022                       | Pelican                |
| OQ584508 | 8 (NS) | USA       | A/black vulture/Georgia/W22-769/2022              | black vulture          |
| OQ584516 | 8 (NS) | USA       | A/black vulture/Georgia/W22-722B/2022             | black vulture          |
| OQ584524 | 8 (NS) | USA       | A/black vulture/Georgia/W22-404A/2022             | black vulture          |
| OQ584532 | 8 (NS) | USA       | A/black vulture/Georgia/W22-750B/2022             | black vulture          |
| OQ584540 | 8 (NS) | USA       | A/black vulture/South Carolina/W22-689B/2022      | black vulture          |
| OQ584548 | 8 (NS) | USA       | A/black vulture/Georgia/W22-675B/2022             | black vulture          |
| OQ584556 | 8 (NS) | USA       | A/black vulture/Georgia/W22-619A/2022             | black vulture          |
| OQ584571 | 8 (NS) | USA       | A/black vulture/Georgia/W22-723B/2022             | black vulture          |
| OQ584586 | 8 (NS) | USA       | A/black vulture/Virginia/W22-667A/2022            | black vulture          |
| OQ584594 | 8 (NS) | USA       | A/black vulture/Georgia/W22-736A/2022             | black vulture          |
| OQ584602 | 8 (NS) | USA       | A/black vulture/Virginia/W22-662C/2022            | black vulture          |
| OQ584610 | 8 (NS) | USA       | A/black vulture/Georgia/W22-722C/2022             | black vulture          |
| OQ584618 | 8 (NS) | USA       | A/black vulture/Georgia/W22-736B/2022             | black vulture          |
| OQ584626 | 8 (NS) | USA       | A/black vulture/Georgia/W22-674/2022              | black vulture          |
| OQ584634 | 8 (NS) | USA       | A/bald eagle/Kansas/W22-384/2022                  | bald eagle             |
| OQ584642 | 8 (NS) | USA       | A/black vulture/Virginia/W22-667D/2022            | black vulture          |
| OQ584650 | 8 (NS) | USA       | A/black vulture/Georgia/W22-675C/2022             | black vulture          |
| OQ584658 | 8 (NS) | USA       | A/black vulture/Virginia/W22-667B/2022            | black vulture          |
| OQ584666 | 8 (NS) | USA       | A/black vulture/Georgia/W22-749C/2022             | black vulture          |
| OQ584674 | 8 (NS) | USA       | A/black vulture/Georgia/W22-719A/2022             | black vulture          |
| OQ584682 | 8 (NS) | USA       | A/black vulture/Georgia/W22-749B/2022             | black vulture          |
| OQ584690 | 8 (NS) | USA       | A/black vulture/Georgia/W22-750A/2022             | black vulture          |
| OQ584705 | 8 (NS) | USA       | A/black vulture/Virginia/W22-667C/2022            | black vulture          |
| OQ584713 | 8 (NS) | USA       | A/black vulture/Georgia/W22-749A/2022             | black vulture          |
| OQ584721 | 8 (NS) | USA       | A/black vulture/Georgia/W22-675A/2022             | black vulture          |
| OQ584729 | 8 (NS) | USA       | A/black vulture/Georgia/W22-404B/2022             | black vulture          |
| OQ584737 | 8 (NS) | USA       | A/black vulture/Georgia/W22-395/2022              | black vulture          |
| OQ584745 | 8 (NS) | USA       | A/black vulture/Virginia/W22-662A/2022            | black vulture          |
| OQ584795 | 8 (NS) | USA       | A/black vulture/Georgia/W22-719C/2022             | black vulture          |
| OQ632902 | 8 (NS) | France    | A/chicken/France/21328/2021                       | chicken                |
| OQ683462 | 8 (NS) | Colombia  | A/chicken/Colombia/Bolivar/3500/2022              | chicken                |
| OQ683470 | 8 (NS) | Colombia  | A/chicken/Colombia/Choco/3502/2022                | chicken                |
| OQ683478 | 8 (NS) | Colombia  | A/chicken/Colombia/Choco/3504/2022                | chicken                |
| OQ683486 | 8 (NS) | Colombia  | A/chicken/Colombia/Cordoba/3499/2022              | chicken                |
| OQ683494 | 8 (NS) | Colombia  | A/chicken/Colombia/Magdalena/3503/2022            | chicken                |
| OQ683502 | 8 (NS) | Colombia  | A/wild duck/Colombia/Choco/3501/2022              | wild duck              |
| OQ694810 | 8 (NS) | USA       | A/black vulture/Georgia/W22-1048/2022             | black vulture          |
| OQ694850 | 8 (NS) | USA       | A/snow goose/Kansas/W22-1143/2022                 | snow goose             |
| OQ694858 | 8 (NS) | USA       | A/black vulture/North Carolina/W22-1078/2022      | black vulture          |
| OQ694866 | 8 (NS) | USA       | A/black vulture/South Carolina/W22-1112/2022      | black vulture          |
| OQ694874 | 8 (NS) | USA       | A/black vulture/South Carolina/W22-1080B/2022     | black vulture          |
| OQ694882 | 8 (NS) | USA       | A/snow goose/Louisana/W22-1163/2022               | snow goose             |
| OQ694890 | 8 (NS) | USA       | A/black vulture/Georgia/W22-1049/2022             | black vulture          |
| OQ694898 | 8 (NS) | USA       | A/black vulture/Georgia/W22-1057B/2022            | black vulture          |
| OQ694906 | 8 (NS) | USA       | A/Canada goose/North Carolina/W22-1055/2022       | Canada goose           |
| OQ694916 | 8 (NS) | USA       | A/black vulture/Georgia/W22-1057D/2022            | black vulture          |
| OQ694924 | 8 (NS) | USA       | A/mallard/North Carolina/W22-1114A/2022           | mallard                |
| OQ694932 | 8 (NS) | USA       | A/snow goose/Louisana/W22-1146A/2022              | snow goose             |
| OQ694940 | 8 (NS) | USA       | A/black vulture/North Carolina/W22-1051A/2022     | black vulture          |
| OQ694948 | 8 (NS) | USA       | A/black vulture/Tennessee/W22-1150B/2022          | black vulture          |
| OQ694956 | 8 (NS) | USA       | A/black vulture/Tennessee/W22-1149/2022           | black vulture          |
| OQ696056 | 8 (NS) | USA       | A/Ross's goose/Kansas/W22-1154/2022               | Ross's goose           |
| OQ696067 | 8 (NS) | USA       | A/red-tailed hawk/Kansas/W22-1155/2022            | red-tailed hawk        |
| OQ732944 | 8 (NS) | USA       | A/black vulture/Georgia/W22-969B/2022             | black vulture          |
| OQ732952 | 8 (NS) | USA       | A/black vulture/South Carolina/W22-1080A/2022     | black vulture          |

|          |        |      |                                                          |                            |
|----------|--------|------|----------------------------------------------------------|----------------------------|
| QQ732960 | 8 (NS) | USA  | A/blue-winged teal/Minnesota/AV22-690/2022               | blue-winged teal           |
| QQ732968 | 8 (NS) | USA  | A/red-tailed hawk/Kentucky/W23-143/2022                  | red-tailed hawk            |
| QQ732976 | 8 (NS) | USA  | A/blue-winged teal/Texas/UGAI22-2966/2022                | blue-winged teal           |
| QQ732984 | 8 (NS) | USA  | A/black vulture/Georgia/W22-933C/2022                    | black vulture              |
| QQ732992 | 8 (NS) | USA  | A/bald eagle/North Carolina/W23-142B/2023                | bald eagle                 |
| QQ733000 | 8 (NS) | USA  | A/blue-winged teal/Texas/UGAI22-3268/2022                | blue-winged teal           |
| QQ733008 | 8 (NS) | USA  | A/blue-winged teal/Minnesota/UGAI22-3620/2022            | blue-winged teal           |
| QQ733016 | 8 (NS) | USA  | A/blue-winged teal/Texas/UGAI22-3250/2022                | blue-winged teal           |
| QQ733024 | 8 (NS) | USA  | A/bald eagle/North Carolina/W23-142A/2023                | bald eagle                 |
| QQ733032 | 8 (NS) | USA  | A/blue-winged teal/Texas/UGAI22-3189/2022                | blue-winged teal           |
| QQ733040 | 8 (NS) | USA  | A/blue-winged teal/Minnesota/AV22-675/2022               | blue-winged teal           |
| QQ733048 | 8 (NS) | USA  | A/black vulture/North Carolina/W22-1079C/2022            | black vulture              |
| QQ733056 | 8 (NS) | USA  | A/black vulture/Louisiana/W23-119/2023                   | black vulture              |
| QQ733064 | 8 (NS) | USA  | A/black vulture/Georgia/W22-972A/2022                    | black vulture              |
| QQ733072 | 8 (NS) | USA  | A/bald eagle/South Carolina/W23-142A/2023                | bald eagle                 |
| QQ733080 | 8 (NS) | USA  | A/blue-winged teal/Texas/UGAI22-3226/2022                | blue-winged teal           |
| QQ733096 | 8 (NS) | USA  | A/bald eagle/Virginia/W22-101/2023                       | bald eagle                 |
| QQ733104 | 8 (NS) | USA  | A/blue-winged teal/Texas/UGAI22-3190/2022                | blue-winged teal           |
| QQ733112 | 8 (NS) | USA  | A/blue-winged teal/Texas/UGAI22-2961/2022                | blue-winged teal           |
| QQ733120 | 8 (NS) | USA  | A/black vulture/Georgia/W22-1056A/2022                   | black vulture              |
| QQ733128 | 8 (NS) | USA  | A/blue-winged teal/Minnesota/UGAI22-3611/2022            | blue-winged teal           |
| QQ733136 | 8 (NS) | USA  | A/black vulture/Louisiana/W23-118/2023                   | black vulture              |
| QQ733144 | 8 (NS) | USA  | A/Canada goose/Virginia/W22-773/2022                     | Canada goose               |
| QQ733152 | 8 (NS) | USA  | A/blue-winged teal/Minnesota/AV22-680/2022               | blue-winged teal           |
| QQ733160 | 8 (NS) | USA  | A/mallard duck/Minnesota/AV22-632/2022                   | mallard duck               |
| QQ734882 | 8 (NS) | USA  | A/red-tailed hawk/Kansas/W22-1226/2022                   | red-tailed hawk            |
| QQ734890 | 8 (NS) | USA  | A/bald eagle/Tennessee/W23-003/2022                      | bald eagle                 |
| QQ734898 | 8 (NS) | USA  | A/American green-winged teal/Texas/UGAI22-3462/2022      | American green-winged teal |
| QQ734906 | 8 (NS) | USA  | A/Cooper's hawk/Kansas/W22-1206/2022                     | Cooper's hawk              |
| QQ734922 | 8 (NS) | USA  | A/brown pelican/North Carolina/W23-019/2022              | brown pelican              |
| QQ734930 | 8 (NS) | USA  | A/double-crested cormorant/North Carolina/W22-1215C/2022 | double-crested cormorant   |
| QQ734941 | 8 (NS) | USA  | A/herring gull/North Carolina/W1215B/2022                | herring gull               |
| QQ734968 | 8 (NS) | USA  | A/black vulture/North Carolina/W22-1213/2022             | black vulture              |
| QQ734976 | 8 (NS) | USA  | A/bald eagle/Virginia/W22-1222/2022                      | bald eagle                 |
| QQ737757 | 8 (NS) | USA  | A/black vulture/Georgia/W22-719B/2022                    | black vulture              |
| QQ737765 | 8 (NS) | USA  | A/blue-winged teal/Minnesota/UGAI22-3591/2022            | blue-winged teal           |
| QQ737773 | 8 (NS) | USA  | A/great black-backed gull/North Carolina/W22-1215A/2022  | great black-backed gull    |
| QQ747884 | 8 (NS) | Peru | A/Peruvian pelican/Peru/A074/2022                        | Peruvian pelican           |
| QQ747885 | 8 (NS) | Peru | A/Belcher's_gull/Peru/A102/2022                          | Belcher's_gull             |
| QQ747886 | 8 (NS) | Peru | A/Peruvian pelican/Peru/A106/2022                        | Peruvian pelican           |
| QQ747887 | 8 (NS) | Peru | A/Belcher's_gull/Peru/A267/2022                          | Belcher's_gull             |
| QQ747888 | 8 (NS) | Peru | A/American kestrel/Peru/A273/2022                        | American kestrel           |
| QQ789279 | 8 (NS) | USA  | A/American wigeon/South Carolina/AH0195145/2021          | American wigeon            |
| QQ851651 | 8 (NS) | USA  | A/Pekin duck/California/T2202390/2022                    | Pekin duck                 |
| QQ954524 | 8 (NS) | USA  | A/bald eagle/South Carolina/W23-201A/2023                | bald eagle                 |
| QQ954532 | 8 (NS) | USA  | A/bald eagle/South Carolina/W23-201B/2023                | bald eagle                 |
| QQ954540 | 8 (NS) | USA  | A/black vulture/Louisiana/W23-166/2023                   | black vulture              |
| QQ982392 | 8 (NS) | USA  | A/mallard duck/Minnesota/UGAI22-3846/2022                | mallard duck               |
| QQ982400 | 8 (NS) | USA  | A/bald eagle/North Carolina/W23-012/2022                 | bald eagle                 |
| QQ982408 | 8 (NS) | USA  | A/blue-winged teal/Louisiana/UGAI22-3889/2022            | blue-winged teal           |
| QQ982416 | 8 (NS) | USA  | A/blue-winged teal/Minnesota/UGAI22-3834/2022            | blue-winged teal           |
| QQ982424 | 8 (NS) | USA  | A/blue-winged teal/Louisiana/UGAI22-3875/2022            | blue-winged teal           |
